# Supplementary material for: A computationally efficient engineering aerodynamic model for non-planar wind turbine rotors
Source: Copernicus journal article supplement (doi:10.5194/wes-2021-100), 2021-09-17
Supplement: Supplementary file [file wes-2021-100-AC1-supplement.pdf]

November 25, 2021

Dear Reviewers

First of all, we would like to thank you for the constructive and detailed comments on our article. Please find below our responses (in black) to your comments (in blue). In addition to changes suggested by the reviewers, we updated the definition of the loads from out-of-plane, in-plane and radial loads to axial, tangential and radial loads, which is more precise. The other content in the figures are not changed. At the end of this letter, we have included a marked-up version showing all changes in the manuscript.

Yours sincerely

A. Li, M. Gaunaa, G. R. Pirrung and S. G. Horcas

**Comments to Reviewer #1**

The authors developed a new methodology for the simulation of Horizontal-Axis Wind Turbines (HAWTs) with dihedral blades, i.e. developing out of the rotation plane of the rotor, and not negligible coning. This approach combines the standard Blade Element Momentum (BEM) with a new correction based on the Vortex Cylinder (VC) model previously developed by the authors. The proposed method was tested on a selected large size turbine for different blade out-of-plane bending and rotor cone angles and the obtained predictions were compared with those of the BEM and two high-order methods, i.e. Lifting Line Theory (LLT) and blade-resolved CFD, in terms of blade spanwise load distributions. A promising accuracy improvement is observed with the new method compared to traditional BEM.

The reviewer believes that the topic and the activity is very interesting, innovative and worthy of investigation. The adopted methodology is rigorous and clearly detailed throughout the whole paper, which is very well presented. Some specific considerations:

Section 3: it would be helpful for the reader to add a schematic representation of the vortex cylinder method, in which the different components of the formulation – root vortex, vortex cylinder and bound vortex disc – are clearly highlighted in the turbine rotor frame

Based on the aforementioned comments, the publication of the paper in the present form is strongly recommended.

Thank you for your comments. We included an illustration of the different components of the vortex cylinder model in Fig. 2.

## Comments to Reviewer #2

A well written and interesting paper about a fast rotor aerodynamic performance prediction method to simulate out of plane geometries. This is believed to contain a nice contribution to the field.

General comments:

Although the current paper already includes a significant amount of work, it could be recommended to study more operating points along the power curve (e.g. instead of focusing on different cone and dihedral shapes) to also investigate the effectiveness for these different conditions? If the application of this method truly lies in design and optimization it would be good to base the conclusions on more than a single operating point.

Thank you for the comment. We agree it is important to show more operating conditions. We included a new section (Sect. 7.4) that is focused on a single dihedral blade geometry (W-1) operating at three different operational conditions that have lower loading, compared to the high loading cases that are previously shown. The three cases correspond to rotor thrust coefficients of approximately 0.4, 0.2 and 0.1, respectively.

Along this line of recommendations also lies the application of this method to unsteady aerodynamic or aero-elastic phenomena, e.g. quantifying its impact on aerodynamic damping in turbulent inflow.

The aerodynamic damping on the blade and including the current method into an aeroelastic simulation involve unsteady aerodynamic effects. We think that future work on the unsteady effect of non-planar rotors is interesting to be investigated. We added sentences in Sect. 8 to highlight this future work:

*Thirdly, it would be interesting to investigate the unsteady effects of the non-planar rotor, such as aerodynamic damping and dynamic inflow effect.*

For the prediction of the aerodynamic damping in rotation and under turbulent inflow, we consider there will be almost no difference between the proposed vortex cylinder model and the momentum theory. This is because the fast response is represented by the 2-D airfoil aerodynamic (dynamic stall model) and the slow response is represented by the dynamic inflow effect. For the aeroelastic simulations, the existing dynamic inflow model assumes a planar rotor. However, the vortex cylinder model can be further modified to account for the dynamic inflow characteristics of non-planar rotors.

It is mentioned that the computational effort is similar to a BEM method. Can this be further quantified also in relation to the LL and CFD simulations?

We included a new section (Sect. 7.5) that is dedicated to describing the computational effort of different aerodynamic models that are used in the present work. The high performance computing (HPC) cluster setup and the corresponding wall clock time of the RANS Navier-Stokes solver, as well as the lifting-line method, are presented. The CPU time for the BEM method and the proposed

vortex cylinder method is also described.

Specific comments:

2 p2 line 11/12 Can the authors supply a reference for this claim?

We included an reference by Madsen and Rasmussen [1].

3 p6 line 17: The application of the vortex cylinder is mentioned for modeling yawed flow. Can the authors comment on the useability of the current implementation focusing on out of plane shapes for the modeling of yawed flow?

We believe that the method can be extended for the modelling of a non-planar rotor under yawed flow, but future work is needed. The work would be based on the present work and the previous work by Branlard and Gaunaa [2]. We included a sentence in Sect. 8 to highlight this aspect as future work:

*Fourthly, it is beneficial to further develop the vortex cylinder model for the application of non-planar rotors in yawed flow.*

7.1 p24 What kind of  $C_{dax}$ ,  $a$  are we at? AOA? Some idea would be nice.

We included the sentences that describes the operational condition of the baseline straight blade case:

*At this operational condition, the thrust coefficient of the unconed rotor with baseline straight blades is 0.90 and the rotor power coefficient is 0.46, as predicted by the BEM method. At radius of 70 m, the angle of attack predicted by the BEM method is  $5.76^\circ$ .*

7.2.1 p25 Fig. 9. The authors rightly mention it would be difficult to draw conclusions based on the absolute loads plots and therefore proceed with a plot relative to the baseline case. Can the authors perhaps comment on the fact that the difference between the LL and BEM simulation for the baseline case is of a similar magnitude compared to the effect of dihedral?

Despite the difference between the LL method and the BEM/BEM-VC methods for the baseline case, the BEM-VC method is favourable for the application in a multi-fidelity optimization framework because it can model the influence of blade dihedral. We included the following paragraph in Sect. 7.2.2 to describe this:

*It should be mentioned that the difference between the higher-fidelity models (CFD and LL) and the BEM-VC method for the baseline straight blade is of similar magnitude as the influence due to blade dihedral. However, since the model predicts the sensitivity of changes in dihedral relatively well, it is favourable to be used for parameter studies and to be eventually integrated in a multi-fidelity aerodynamic optimization framework. For example, in order to design a rotor with dihedral blades, higher-fidelity models could be used for the initial design of a straight blade. Then, the proposed vortex cylinder model could be used to explore the sensitivity of different dihedral*

*parameters on the aerodynamic loads, with a relatively low computational effort.*

7.2.2 p27 Line 9/10 Can the authors comment on the physics behind the observation of the impact of dihedral inboard of the start of the dihedral?

We included the following sentences in Sect. 7.2.2 to describe the difference of the effects of the blade dihedral and the blade sweep using vortex theory:

*This could be explained by the out-of-plane blade shape moving the starting position of the trailed vortex system in the axial direction. That, in turn, could effectively move the inner parts of the rotor further into or out of the induction field created by the vortex sheets trailed from the outer sections. By contrast, the influence of blade sweep on the trailed vortex is only on the azimuthal starting position of the trailed vortex. If we consider the trailed vortex as a frozen helical wake, sweeping the blade would only result in an azimuthal twisting of the helical wake. Therefore, the shape of the vortex wake would almost remain unchanged, so that the influence on the induction would not be global.*

p32 Table 2 and 3 are perhaps better visualized in a line or bar plot??

We agree that the bar plot visualizes the results better compared to the table. We have replaced two tables with two bar plots in Sect. 7.3. The aerodynamic power and thrust of the rotor with baseline straight blades in the two tables (previously Table 2 and 3) are summarized into a new table (Table 2).

## Bibliography

- [1] H. Madsen and F. Rasmussen. The influence on energy conversion and induction from large blade deflections. *Wind Energy for the Next Millennium. Proceedings*, pages 138–141, 1999.
- [2] E. Branlard and M. Gaunaa. Cylindrical vortex wake model: skewed cylinder, application to yawed or tilted rotors. *Wind Energy*, 19(2):345–358, 2016.

# A computationally efficient engineering aerodynamic model for non-planar wind turbine rotors

Ang Li<sup>1</sup>, Mac Gaunaa<sup>1</sup>, Georg Raimund Pirrung<sup>1</sup>, and Sergio González Horcas<sup>1</sup>

<sup>1</sup>Department of Wind Energy, Technical University of Denmark, Frederiksborgvej 399, DK-4000 Roskilde, Denmark

**Correspondence:** Ang Li (angl@dtu.dk)

**Abstract.** In the present work, a computationally efficient engineering model for the aerodynamic load calculation of non-planar wind turbine rotors is proposed. The method is based on the vortex cylinder model, and can be used in two ways: either as a correction to the currently widely used blade element momentum (BEM) method, or used as the main model, replacing the BEM method in the engineering modelling complex. The proposed method needs the same order of computational effort as the ordinary BEM method, which makes it ideal for time-domain aero-servo-elastic simulations. The results from the proposed method are compared with results from two higher-fidelity aerodynamic models: a lifting-line method and a Navier-Stokes solver. For planar rotors, the aerodynamic loads are identical to the current BEM model when the drag force is excluded during the calculation of the induced velocities. For non-planar rotors, the influence of the blade out-of-plane shape, measured by the difference of the load between the non-planar rotor and the planar rotor, is in very good agreement with higher-fidelity models. Meanwhile, the existing BEM methods, even with a correction of radial induction included, show relatively large deviations from the higher-fidelity method results.

*Copyright statement.* TEXT

## 1 Introduction

The blade element momentum (BEM) method has long been dominant in the low-fidelity aerodynamic modelling of horizontal-axis wind turbines. Until now, it is the main working horse for wind turbine aero-servo-elastic simulations and is widely used in the wind turbine design and optimization framework. There are many explicit and implicit assumptions in the BEM method. The BEM method explicitly assumes that uniform inflow is applied to the rotor that is operating at a high tip-speed ratio and the stream tubes are independent of each other. The model also implicitly assumes a planar rotor with straight blades and using quasi-steady aerodynamics. There has been extensive work on the modifications and corrections to the BEM method, such as dynamic stall model (Leishman and Nguyen, 1990; Hansen et al., 2004; Larsen et al., 2007), dynamic inflow model (Schepers and Snel, 1995; Yu et al., 2019), polar-grid based unsteady BEM (Madsen et al., 2020a), modelling of turbulent inflow (Mann, 1994), high-thrust correction (Spera, 1994; Madsen et al., 2020a; Burton et al., 2021) and corrections for operation in yawed conditions (Leishman, 2005).

The results from the BEM method generally show surprisingly good agreement with higher-fidelity models, at least on the integral level. However, due to the progress of wind turbine technology, modern multi-megawatt designs are generally more flexible than the stiff machines of the 1980s. It implies that modern wind turbine blades typically have more prebend, larger cone angle and larger deformations. The influence of blade out-of-plane shapes on the aerodynamics is then more pronounced and can not simply be neglected. Some new developments have even more pronounced out-of-plane shapes. For example, a downwind wind turbine designed for low-wind conditions could have large cone and prebend and possibly dramatic out-of-plane deformations (Madsen et al., 2020b). In addition, some wind turbines are equipped with winglets to reduce the drag force and also the noise. Modern wind turbines are generally designed using mainly the BEM-based codes. Higher-fidelity tools such as lifting-line method (LL) or fully-resolved Navier-Stokes solvers (often referred to as Computational Fluid Dynamics, CFD), are mostly used for comparison or for very specific load cases due to the high computational effort. However, when the blades have large out-of-plane shapes due to prebend, deformation or cone, the results from these BEM codes will have relatively large differences compared to the results from higher-fidelity tools (Madsen and Rasmussen, 1999). This is because the influence of blade out-of-plane shapes is not correctly captured by these BEM-based codes. As a result, a design from an optimization tool using a BEM-based aerodynamics module could be far from the actual optimal solution. There may even exist aeroelastic instabilities that are not correctly captured by the BEM-based tools.

On the other hand, rotor-resolved CFD and lifting-line method are computationally too expensive for extensive use in current and near-future design optimization processes. Navier-Stokes solvers with fully resolved rotor geometry have no difficulties predicting non-planar rotor effects. But for the lifting-line method, care should be taken on the influence of curved bound vortex on itself (Li et al., 2020), the correct directions of applying the lift and drag force and also the possible non-circulatory lift during the aerodynamic load calculation, to correctly predict the effects. Therefore, a low-fidelity model that could capture the most important features of the aerodynamics of non-planar rotors, while maintaining approximately the same level of computational effort as the current BEM methods, would be of great value to both the scientific and the commercial wind turbine communities. Both for the design optimization as well as for the aeroelastic simulations.

In order to correctly account for the out-of-plane shapes of the wind turbine blades in the low-fidelity model, the physics behind the problem should be analyzed and then the most important aspects should be proactively modelled while less important features can be neglected. In the present work, the force on the non-planar rotor is firstly analyzed in a physically consistent way using the Kutta-Joukowski theorem. The conclusion from the analysis is that the streamwise-shifted starting position of the trailed vorticity, due to the non-planar bound vortex surface swept by the blades, will influence both axial and radial induction and both have direct influences on the aerodynamic loads. Therefore, we consider the vortex cylinder model (Branlard and Gaunaa, 2015a) has the potential to capture these most important features in the aerodynamics of the non-planar rotors. There has been previous work by Crawford (2006) using a vortex cylinder model for the aerodynamic calculation of coned rotors. In that work, the same idea of using the axial and radial induction from the vortex cylinder model is proposed, and the closed equations for the model are given in the framework of momentum theory. Some comparisons with actuator disc results for uniform-loaded cases are shown for the planar rotor. And for the coned rotors, the axial induction as well as aerodynamic loads are compared with the results from actuator disc simulations performed by Mikkelsen (2004). The good agreement shows



the potential of the vortex cylinder model for the non-planar rotor. However, the work is limited to the momentum theory framework while the equivalence of the vortex cylinder model and the momentum theory for planar rotors is not highlighted. Furthermore, other important features of the vortex cylinder model for non-planar rotors, such as the similarity to the planar rotors or the impact of unsteady airfoil aerodynamics on the steady-state results, are not described. Nevertheless, the pioneering work by Crawford (2006) inspires the authors and is a good starting point for the current study, which also builds on previous efforts on superposition of vortex cylinders (Branlard and Gaunaa, 2015a).

In the present work, a detailed analysis of the vortex cylinder model for non-planar rotors will be performed. A method based on the vortex cylinder model for the aerodynamic load calculation of such non-planar rotors is then proposed. The description of the implementation of the proposed method is in the framework of the HAWC2 code (Larsen and Hansen, 2007). Some details of the implementation may be different compared to other BEM-based aeroelastic codes. In the present work, only the out-of-plane shape of the blade is considered, which means the blade is assumed to have no in-plane sweep. The engineering aerodynamic model for the blades with only in-plane shapes is described by Li et al. (2021). The structure of the work is as follows: the Kutta-Joukowski analysis of the non-planar rotor is performed in Sect. 2. Then, the vortex cylinder model as well as its relationship with the momentum theory are briefly introduced in Sect. 3. Some important aspects for the implementation of the BEM method and the proposed method for non-planar rotors are described in Sect. 4. The coupling of the blade element theory with the vortex cylinder model, including details on the tip-loss correction and a summary of the algorithm, is described in Sect. 5. The low-fidelity and higher-fidelity aerodynamic models for comparisons are described in Sect. 6. The setup of the test cases is described and the results from the low-fidelity models are compared with the results from higher-fidelity models in Sect. 7. Finally, the conclusions are drawn and the future work is summarized in Sect. 8.

## 20 2 Kutta-Joukowski analysis

For the planar rotor with straight blades, the Kutta-Joukowski analysis was previously used to derive the similarity between the superposition of the vortex cylinders and the BEM method by Branlard and Gaunaa (2015a). In this section, the influence of the blade out-of-plane shapes on the aerodynamics is investigated using the Kutta-Joukowski theorem (Okulov et al., 2015). The blade is assumed only possible to have out-of-plane shapes (dihedral or cone) but no in-plane shapes (blade sweep) in the following analysis.

The coordinate system is defined as follows and is illustrated in Fig. 1. The  $x$ -axis is the axial direction, positive in the incoming wind direction. The rotation vector of the rotor is in the positive  $x$ -direction. The  $y$ -axis is the ‘radial’ direction, which is positive in the direction of increasing radius of the blade. The  $z$ -axis is normal to both  $x$ -axis and  $y$ -axis, and its direction is defined so that a right-handed system is found. The  $z$ -axis is defined as the tangential direction. The airfoils are aligned perpendicular to the main-axis of the half-chord line.

The local dihedral angle is defined to be positive when the blade is tilting upwind, and can be calculated using the blade main-axis geometry.

$$\kappa_i = -\arctan \frac{dx}{dy}(y_i) \quad (1)$$

The analysis is applied to a non-planar rotor with given blade bound circulation and induced velocity at each blade section. For section  $i$  of a blade with radius of  $r_i$ , the bound circulation strength is  $\Gamma_i^B$ , the local dihedral angle is  $\kappa_i$ . The axial, tangential and radial induced velocity are  $u_{a,i}$ ,  $u_{t,i}$  and  $u_{r,i}$ .

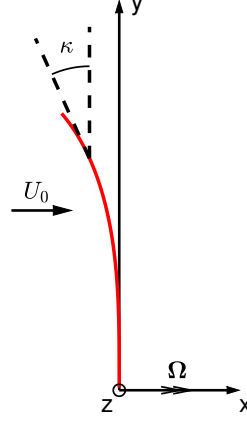

**Figure 1.** The definition of the coordinate system of the wind turbine with only out-of-plane shapes. The  $x$ -axis is the axial direction, positive in the incoming wind direction. The  $y$ -axis is the ‘radial’ direction, which is positive in the direction of increasing radius of the blade. The  $z$ -axis is the tangential direction and is normal to both  $x$ -axis and  $y$ -axis, and its direction is defined so that a right-handed system is found. The rotation vector  $\Omega$  is aligned with the  $x$ -axis.

The relative velocity experienced by the blade section is  $\mathbf{V}_{\text{rel},i}$ . The bound circulation of a blade section  $\Gamma_i^B$  is tangent to the local blade section.

$$\mathbf{V}_{\text{rel},i} = \begin{pmatrix} U_0 + u_{a,i} \\ u_{r,i} \\ -\Omega r_i + u_{t,i} \end{pmatrix}, \quad \mathbf{\Gamma}_i^B = \Gamma_i^B \begin{pmatrix} -\sin \kappa_i \\ \cos \kappa_i \\ 0 \end{pmatrix} \quad (2)$$

With the Kutta-Joukowski theorem in three-dimensional vector form, the lift force on the blade is obtained.

$$\mathbf{f}_i = \rho \mathbf{V}_{\text{rel},i} \times \mathbf{\Gamma}_i^B = \rho \Gamma_i^B \begin{pmatrix} (\Omega r_i - u_{t,i}) \cos \kappa_i \\ (\Omega r_i - u_{t,i}) \sin \kappa_i \\ (U_0 + u_{a,i}) \cos \kappa_i + u_{r,i} \sin \kappa_i \end{pmatrix} \quad (3)$$

In Eq. (3), the force  $\mathbf{f}_i$  is corresponding to lifting force per unit curved blade length. The lifting force per unit radius, corresponding to what is used in momentum theory analysis, is  $\mathbf{f}_i^* = \mathbf{f}_i \frac{ds}{dr}$ , as also shown by Madsen et al. (2020a). The  $\frac{ds}{dr}$  term is representing the ratio of the local change of curved blade length and local change of radius. For blades with only

out-of-plane shapes, it is equal to:  $1/\cos \kappa_i$ .

$$\mathbf{f}_i^* = \mathbf{f}_i \frac{ds}{dr} = \rho \Gamma_i^B \begin{pmatrix} \Omega r_i - u_{t,i} \\ (\Omega r_i - u_{t,i}) \tan \kappa_i \\ (U_0 + u_{a,i}) + u_{r,i} \tan \kappa_i \end{pmatrix} \quad (4)$$

The force  $\mathbf{f}_i^*$  is divided into two parts: a part with and a part without the direct contribution of the local dihedral angle  $\kappa_i$ .

$$\mathbf{f}_i^* = \rho \Gamma_i^B \begin{pmatrix} \Omega r_i - u_{t,i} \\ 0 \\ U_0 + u_{a,i} \end{pmatrix} + \rho \Gamma_i^B \begin{pmatrix} 0 \\ \Omega r_i - u_{t,i} \\ u_{r,i} \end{pmatrix} \tan \kappa_i \quad (5)$$

5 For a non-planar rotor with upwind direction dihedral ( $\kappa_i > 0$ ), such as prebend or upwind cone, some conclusions can be obtained according to Eq. (5). Comparing to the corresponding planar rotor (as shown later on in Fig. 4), the non-planar rotor will have outboard radial force. Furthermore, there will be additional tangential driving force due to the radial induction, which for the wind turbine case is positive. So, to get the correct tangential load distribution and consequently the aerodynamic power, it is not only necessary to correctly model the influence of the non-planarity of the rotor on the axial and tangential induced  
10 velocity, but also on the radial induced velocity. However, the radial induced velocity is not available from the momentum theory.

There are two tracks to modify the BEM method to model the non-planar effects. The first track is based on the previous work on the development of the radial induction correction for the application in the BEM method, derived based on analytical 2-D actuator disc/strip model combined with an engineering fit of the numerical actuator disc simulations (Madsen, 1997;  
15 Madsen et al., 2010):

$$u_r^{\text{Madsen}}(r) = \frac{U_0}{2.24} \frac{C_{T,av}(r)}{4\pi} \ln \left[ \frac{0.04^2 + \left(\frac{r}{R_{\text{tot}}} + 1\right)^2}{0.04^2 + \left(\frac{r}{R_{\text{tot}}} - 1\right)^2} \right] \quad (6)$$

where  $C_{T,av}(r)$  is the averaged thrust coefficient as function of the radial position and is defined as:

$$C_{T,av}(r) = \frac{\int_0^r C_T(r^*) 2\pi r^* dr^*}{\pi r^2} \quad (7)$$

However, the radial induction as well as the axial induction are corresponding to planar rotors.

20 Apart from the momentum theory, which effectively only applies to a planar rotor disc, it is possible to calculate the induced velocity, including the radial component, from analytical equations at each blade section with the superposition of vortex cylinders. So, the second track is based on the vortex cylinder model where the assumption of the planar rotor in the previous work by Branlard and Gaunaa (2015a) is relaxed. This approach inherently includes the effect of axial displacement of the cylindrical wake of the non-planar rotor in a physically consistent manner. The model even has the potential to completely  
25 replace the momentum theory in the BEM method and will be described in the following sections. In the present work, both methods will be tested numerically in Sect. 7.

### 3 Vortex cylinder model

The vortex cylinder model is a simplified representation of the vortex system of a horizontal-axis wind turbine rotor. The model consists of superposition of bound vortex discs, non-expanding vortex cylinders with both tangential and longitudinal vorticity and root vortices (Branlard and Gaunaa, 2015a). ~~It could~~ An illustration of different components in the vortex cylinder model is shown in Fig. 2.

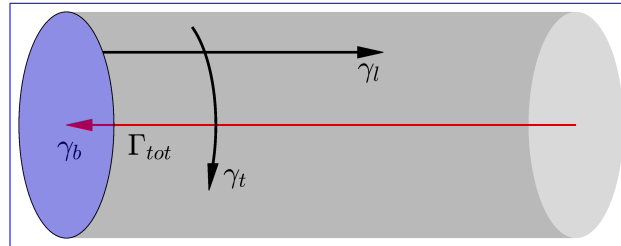

**Figure 2.** Illustration of different components of a right vortex cylinder. The bound vortex disc (in blue) with radial vorticity  $\gamma_b$ , the vortex cylinder (in grey) with longitudinal  $\gamma_l$  and tangential  $\gamma_t$  trailed vortex components, and a root vortex  $\Gamma_{root}$  (in red).

5

This model can be considered as the special ~~condition case~~ of the Joukowski rotor model for the limiting case of ~~infinite the~~ number of blades tending to infinity. It has been shown by Branlard and Gaunaa (2015a) that for a planar rotor, the induced velocities from the version of the vortex cylinder model where the wake rotation effect is neglected, is identical to the induced velocities obtained from the momentum theory when the drag force component is not included in the force balancing from which the induced velocities are calculated. It was also argued by Branlard (2017) that the correct way of implementing the blade element momentum (BEM) method should exclude the drag during the calculation of the induced velocities, and include the drag in the aerodynamic load calculation afterwards.

10

One advantage of the vortex cylinder model over the momentum theory is that the induced velocity at any arbitrary point in the flow field is known. In contrast, from the momentum theory, only the axial and tangential velocity at the rotor disc and at infinitely far up- and down-stream of the rotor plane are known. This advantage has been used in the application of the vortex cylinder model in the calculation of the induction-zone of a wind turbine (Branlard and Meyer Forsting, 2015) and the wind farm blockage effects (Branlard and Meyer Forsting, 2020). Another advantage of the vortex cylinder model over the momentum theory is that it does not require the assumptions of a planar rotor and the flow with constant speed being perpendicular to it. Other applications of the vortex cylinder model include modelling of wind turbines in yaw (Branlard and Gaunaa, 2016) and modelling of the dynamic inflow effects (Yu et al., 2019). The results from all the aforementioned applications compare well with higher-fidelity tools, indicating that the main mechanisms are captured using this framework.

20

When applying the vortex cylinder method to a non-planar rotor, the starting position of the cylindrical vortex sheets follows the curved bound vortex surface and will be displaced upstream or downstream compared to the case of a planar rotor. The induced velocity on the non-planar rotor surface will therefore be different from the induced velocity of a planar rotor. This effect can be modelled by the superposition of the vortex cylinders according to the curved bound vortex surface swept by the

25

blades that have out-of-plane shapes. However, the possibility of using the vortex cylinder model for the non-planar rotor is not well recognized and is thus not widely utilized. The work of Crawford (2006) is on this topic, but the system closure for the non-planar rotor is different compared to the current study. In the current implementation, the system closure is determined in the far-wake, thus assuming the same method of system closure as for the non-planar rotors. Then, the equations of the inductions of the non-planar rotor are in concise forms following this assumption. With the current system closure, which is an important assumption in this work, there are clear physical connections between the vortex cylinder model of a non-planar rotor and a planar rotor, and subsequently the connection to the momentum theory. In the following content of this work, zero yaw error, no rotor tilt and uniform inflow are assumed. The vortex cylinder is then a right cylinder as opposed to an oblique cylinder used in yawed flow analysis (Branlard and Gaunaa, 2016).

### 10 3.1 The right vortex cylinder

The equations of the inductions of a right vortex cylinder have been derived in detail by Branlard and Gaunaa (2015b). The most important equations and conclusions are summarized in this section. A cylindrical vortex sheet can be decomposed into tangential and longitudinal vorticity components. The strength of the tangential vorticity on the vortex cylinder is the ratio of the total vorticity strength to the helical pitch  $h$ . The total vorticity strength of the vortex cylinder  $\Delta\Gamma_{\text{tot}}$  is equal to the trailed vorticity strength of all blades.

$$\gamma_t = -\frac{\Delta\Gamma_{\text{tot}}}{h} \quad (8)$$

The tangential vorticity contributes to both axial and radial induced velocities. For the vortex cylinder with radius  $R$  at axial position  $x = 0$ , the axial and radial induced velocity at the calculation point with radius of  $r$  and axial position of  $x$  are shown to be in the form of complete elliptic integrals (Branlard and Gaunaa, 2015b).

$$20 \quad u_a(r, x) = \frac{\gamma_t}{2} \left[ \frac{R-r+|R-r|}{2|R-r|} + \frac{xk(r, x)}{2\pi\sqrt{rR}} \left( K(k^2(r, x)) + \frac{R-r}{R+r} \Pi(k^2(r, 0), k^2(r, x)) \right) \right] \quad (9)$$

$$u_r(r, x) = -\frac{\gamma_t}{2\pi} \sqrt{\frac{R}{r}} \left[ \frac{2-k^2(r, x)}{k(r, x)} K(k^2(r, x)) - \frac{2}{k(r, x)} E(k^2(r, x)) \right] \quad (10)$$

where

$$k^2(r, x) = \frac{4rR}{(R+r)^2 + x^2} \quad (11)$$

and  $K(m)$ ,  $E(m)$  and  $\Pi(n, m)$  are the complete elliptic integral of the first, second and third kind.

25 The other components of the vortex cylinder, which are the bound vortex disc, the longitudinal vorticity and the root vortex line, only have contribution to the tangential velocity. The tangential induced velocity of the entire flow field is derived

by Branlard and Gaunaa (2015b) as follows:

$$u_t(r, x) = \begin{cases} -\frac{\Delta\Gamma_{tot}}{4\pi r} & (r < R, x = 0) \text{ or } (r = R, x > 0) \\ -\frac{\Delta\Gamma_{tot}}{2\pi r} & (r < R, x > 0) \\ 0 & \text{otherwise (outside the vortex cylinder)} \end{cases} \quad (12)$$

### 3.2 Superposition of vortex cylinders for planar rotors

Consider the superposition of the Joukowski rotor model to achieve radially varying bound circulation. There will be helical trailed vorticities emanated along each blade with the strength equal to the derivative of the bound circulation strength with respect to the radius. In Joukowski's rotor model, it is assumed that the radial distribution of the bound circulation of all blades are the same. Then consider the corresponding vortex cylinder model that is the limiting case of Joukowski's rotor model, where the number of blades tends to infinity. It is consisted of a superposition of cylindrical vortex sheets with both tangential and longitudinal vorticity. Details of the superposition of vortex cylinders have been described by Branlard and Gaunaa (2015a). The most important aspects are summarized in this section.

With the superposition of the vortex cylinders, the bound circulation is assumed to be piecewise constant along the blade. The blade is discretized radially into  $n$  sections and there will be one calculation point for each section. Consequently, there will be  $(n + 1)$  trailing points corresponding to  $(n + 1)$  vortex cylinders. For the inner-most part of the rotor, which is usually the rotor hub and is defined from the center of rotation to the beginning of the first blade section, the bound circulation strength is zero since there are no blades. For the ease of notation and calculation, two ghost sections with the index of 0 and  $n + 1$  with zero circulation strength are introduced. For the system, the number of unknown variables is  $n$ , which is equal to the number of sections. A sketch of the superposition of the cylindrical vortex system is shown in Fig. 3.

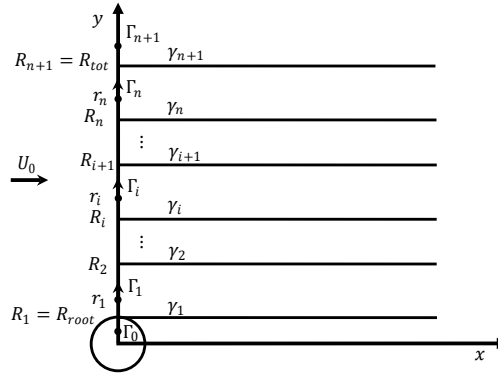

**Figure 3.** Sketch of the superposition of the cylindrical vortex system. The blade is extending from  $R_{root}$  to  $R_{tot}$  and is discretized into  $n$  sections. For section  $i$ , the radius of this calculation point is  $r_i$  and the two neighbouring vortex cylinders are with the radius of  $R_i$  and  $R_{i+1}$ , and with the tangential vorticity strength of  $\gamma_{t,i}$  and  $\gamma_{t,i+1}$ . Two ghost sections with the index of 0 and  $n + 1$  are introduced. These two ghost sections are defined to have zero bound circulation strength.

The closure of the system determines the tangential vorticity strength of each vortex cylinder. The closure of the system is determined at the far-wake, the cylindrical vortex sheet is assumed to convect at a constant speed equal to the mean of the two far-wake velocities surrounding the vortex sheet (Branlard and Gaunaa, 2015a). It can be shown that the system closure can be performed in the form of helical pitch  $h(r)$  or the annulus axial induction factor  $a(r)$  at the rotor disc, and the two formulations are equivalent to each other. The system closure in the form of the annulus axial induction factor will be used in this work and will be briefly described.

With the system closure, the axial induction factor of section  $i$  is calculated as follows:

$$a_i = -\frac{u_{a,i}}{U_0} = \frac{1}{2} \left[ 1 - \sqrt{1 - C_{T,\text{eff},i}} \right] \quad (13)$$

The effective thrust coefficient  $C_{T,\text{eff},i}$  is equal to the thrust coefficient from the Kutta-Joukowski analysis  $C_{T,\text{KJ},i}$  minus the contribution of wake rotation  $C_{T,\text{rot},i}$ .

$$C_{T,\text{eff},i} = C_{T,\text{KJ},i} - C_{T,\text{rot},i} \quad (14)$$

where

$$C_{T,\text{KJ},i} = \frac{N_B f_{i,x}^* dr}{\frac{1}{2} \rho U_0^2 2\pi r_i} = k_{s,i} \left( 1 + \frac{k_{s,i}}{4\lambda_{r_i}^2} \right) = k_{s,i} (1 + a'_i) \quad (15)$$

$$C_{T,\text{rot},i} = \sum_{j \geq i+1} \left( \frac{k_{s,j}}{2} \right)^2 \left( \frac{1}{\lambda_{R_j}^2} - \frac{1}{\lambda_{R_{j+1}}^2} \right) \quad (16)$$

The wake rotation effect increases toward the rotor rotational axis, and decreases when the tip-speed ratio increases. For typical modern wind turbine designs the effect of this term is rather small and may be neglected.

In Eqs. (15) and (16),  $k_{s,i}$  is the total non-dimensional bound circulation of section  $i$  and  $\lambda_r$  is the local speed ratio for the position with radius  $r$ . The tangential induction factor  $a'_i$  is defined as follows and can be calculated according to Eq. (12) with the condition of  $x = 0$ .

$$k_{s,i} = \frac{\Omega \Gamma_i}{\pi U_0^2} \quad (17)$$

$$\lambda_r = \frac{\Omega r}{U_0} \quad (18)$$

$$a'_i = \frac{-u_{t,i}}{\Omega r_i} = \frac{\sum_{j=i}^n \frac{\Gamma_j - \Gamma_{j+1}}{4\pi r_i}}{\Omega r_i} = \frac{k_{s,i}}{4\lambda_{r_i}^2} \quad (19)$$

Considering Eqs. (15) and (16), when the wake rotation effect is included, the aerodynamic loading of a section is dependent on all sections that are further outboard comparing to it. The system could be solved from outboard to inboard using Eq. (13), and the system closure is completed when the annulus axial induction factor of all blade sections are calculated. Then, the tangential vorticity of the vortex cylinder that is just inside section  $i$  is obtained from the annulus axial induction factor of this section and the neighbouring section inside. The equation can be derived from Eq. (9) using the condition of  $x = 0$ .

$$\gamma_{t,i} = 2U_0(a_i - a_{i-1}) \quad (20)$$

### 3.3 High-thrust correction

In the vortex cylinder model, the relationship between the axial induction factor and the effective thrust coefficient is in the same form as in the momentum theory:  $C_{T,\text{eff},i} = 4a_i(1 - a_i)$ , by inverting Eq. (13). However, when the thrust coefficient ( $C_T$ ) is high, especially when  $C_T > 1$ , the momentum theory breaks down and the vortex cylinder model will give unphysical results. Then, corrections should be made for these high-thrust conditions. Different high-thrust corrections are available, such as the linear extrapolation by Spera (1994) and the polynomial function of  $a$  and  $C_T$  by Madsen et al. (2020a). To be consistent with the BEM module implemented in the HAWC2 code (Larsen and Hansen, 2007), the polynomial function of  $a$  and  $C_T$  by Madsen et al. (2020a) is chosen. Then, in the system closure, the equation of axial induction factor from the thrust coefficient in Eq. (13) should be replaced by:

$$a_i = f_{a-C_T}^{\text{Madsen}}(C_{T,i}) = k_3 C_{T,i}^3 + k_2 C_{T,i}^2 + k_1 C_{T,i} \quad (21)$$

where the coefficients  $k_1 \dots k_3$  are defined:  $k_1 = 0.2460$ ,  $k_2 = 0.0586$  and  $k_3 = 0.0883$ .

### 3.4 System closure of non-planar rotors

The system closure of the vortex cylinder model for planar rotors has been described in Sect. 3.2. It is assumed that each vortex cylinder convects with a constant velocity that is determined in the far-wake. With this method of system closure, the relationship between the vortex cylinder model and the momentum theory is revealed by Branlard and Gaunaa (2015b) and the results are generally in good agreement with higher-fidelity models. The reason is probably that the error introduced when assuming the convective velocity is constant balances the error introduced when assuming the non-expanding wake as shown for the uniformly loaded disc (Øye, 1990; Madsen et al., 2007). In the present work, we assume the same method of system closure as for the planar rotor case: the closure is determined at the far-wake, and can be used for non-planar rotors with moderate out-of-plane shapes. With this assumption, the equations are in concise forms and can clearly show the connections between the model for a non-planar rotor and a planar rotor. However, this assumption does not necessarily hold for extreme cases. To investigate this, a numerical test of blades with relatively large prebend and cone angle will be shown in Sect. 7.

For illustration, we show the superposition of the vortex cylinders for a non-planar rotor and the corresponding planar rotor with the same radial discretization in Fig. 4. For each section, the corresponding planar rotor has the same total bound circulation (of all blades)  $\Gamma_i^{\text{pl}}$  as that of the non-planar rotor  $\Gamma_i^{\text{np}}$ .

#### 3.4.1 Similarity of thrust coefficient

The first similarity is the calculation of the thrust coefficient of the non-planar rotor and the corresponding planar rotor. For the non-planar rotor, the Kutta-Joukowski thrust coefficient of section  $i$  is calculated from the  $x$ -component of the force in Eq. (5), obtained using the Kutta-Joukowski analysis.

$$C_{T,\text{KJ}}^{\text{np}} = \frac{\Omega \Gamma_i^{\text{np}}}{\pi U_0^2} (1 + a'^{\text{np}}) \quad (22)$$



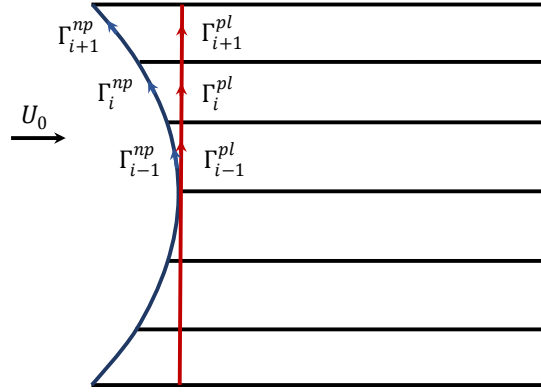

**Figure 4.** Side-view of the vortex system of the non-planar rotor and the corresponding planar rotor. The two vortex systems are with the same radial discretization and radial distribution of bound vorticity. The tangential and longitudinal trailed vorticity strengths of the two systems will be identical.

For the planar rotor, the thrust coefficient is also obtained using Eq. (5):

$$C_{T,KJ}^{pl} = \frac{\Omega \Gamma_i^{pl}}{\pi U_0^2} (1 + a'^{pl}) \quad (23)$$

Since  $\Gamma_i^{np} = \Gamma_i^{pl}$ , and when assuming the tangential induction factor  $a'$  of the non-planar rotor and the corresponding planar rotor are the same, which will be proven analytically in Sect. 3.4.3, then the Kutta-Joukowski thrust coefficient of the non-planar rotor and the planar rotor are identical. In addition, the contribution of the wake rotation to the thrust coefficient will also be identical. So, with the given bound circulation distribution of the non-planar rotor, the thrust coefficient distribution can be directly calculated as if the rotor is planar. This is true no matter the wake rotation effect is included or excluded.

### 3.4.2 Similarity of tangential and longitudinal vorticity in the wake

The second similarity is that the two vortex wake systems are having the same tangential and longitudinal vorticity strength distribution. For the two rotors with the same radial distribution of bound circulation, it can be easily shown that the trailed vorticity strengths between each section are the same.

$$\Gamma_i^{np} - \Gamma_{i+1}^{np} = \Gamma_i^{pl} - \Gamma_{i+1}^{pl} \quad (24)$$

According to the assumption, the closure of the superposition of the vortex cylinders is determined at the far-wake (infinitely far downstream). Therefore, there is no influence of the changed starting position of the vortex cylinders. As a result, both the tangential and longitudinal vorticity of the non-planar rotor wake is the same as that of the corresponding planar rotor that has the same bound circulation distribution.

According to the description in Sect 3.4.1, the annulus axial induction of the corresponding planar rotor can be calculated from the thrust coefficient of the non-planar rotor since the thrust coefficient of the two rotors are identical. Then, since the non-

planar rotor and the corresponding planar rotor have the same tangential vorticity strength, the tangential vorticity strength of the non-planar rotor can be calculated from the annulus axial induction factor of the corresponding planar rotor using Eq. (20). This means with given bound circulation distribution, the tangential vorticity of the non-planar rotor can also be calculated as if the rotor is planar. The same argument can also be made for the longitudinal vorticity in the wake.

### 5 3.4.3 Similarity of tangential induction

It is assumed that the radial distribution of the tangential induction factor of the non-planar rotor is the same as the corresponding planar rotor in Sect. 3.4.1, this will be analytically proven in this section. Firstly, consider the superposition of the planar vortex cylinders consisting of bound vortex discs as well as tangential and longitudinal trailed vorticities, as shown in Fig. 4. The total strength of the root vortex is zero. Since the tangential vorticities have no contribution to the tangential induction, only the bound vortex discs and the longitudinal vorticity are considered here. For a better illustration, the side view of a part of the axisymmetric vortex system that was illustrated in Fig. 4 is shown in Fig. 5.

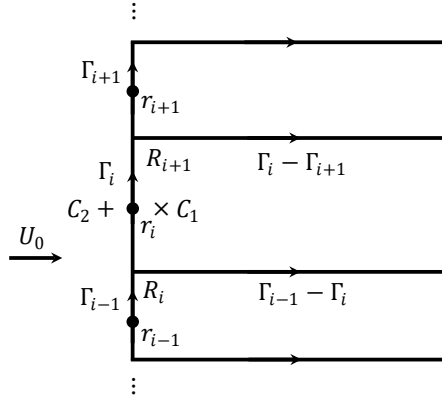

**Figure 5.** Side-view of a part of the axisymmetric vortex system of the planar rotor. The bound vorticity and trailed vorticity are highlighted. The two points of interest are marked with  $\times$  and  $+$ , which are just inside and outside the section  $i$ . The two circular contours of  $C_1$  and  $C_2$  pass through the two points of interest respectively.

Consider the point  $\times$  in Fig. 5 with radial position of  $r_i$  that is between  $R_i$  and  $R_{i+1}$ , and is just inside the vortex cylinder ( $x = 0^+$ ). The circular contour line  $C_1$  is perpendicular to the flow, passes point  $\times$  with radius  $r_i$  and centered on the line of  $r = 0$ . With the axisymmetry of the flow, the tangential velocity has the same value all along the circular contour.

15 Recall the definition of circulation:

$$\Gamma = \oint_C \mathbf{V} \cdot d\mathbf{l} \quad (25)$$

The relationship between the velocity along the contour line  $C_1$ , which is the tangential velocity at  $r_i$  and the net circulation through the contour  $C_1$ , is obtained using the definition of circulation in Eq. (25).

$$\sum_{j=1}^i (\Gamma_{j-1} - \Gamma_j) = -\Gamma_i = u_t(r_i, 0^+) 2\pi r_i \quad (26)$$

So, the tangential velocity at point  $\times$  that is just inside the vortex cylinder is:

$$5 \quad u_t(r_i, 0^+) = -\frac{\Gamma_i}{2\pi r_i} \quad (R_i < r_i < R_{i+1}) \quad (27)$$

For the point  $+$  in Fig. 5 with radial position of  $r_i$  and is just outside the vortex cylinder ( $x = 0^-$ ), consider the circular contour line  $C_2$  with radius  $r_i$  that is perpendicular to the flow, passing point  $+$  and is centered on the line of  $r = 0$ . Similarly, use the definition of circulation in Eq. (25), the tangential velocity at point  $+$  is zero since there is no net circulation passing through the contour  $C_2$ .

$$10 \quad u_t(r_i, 0^-) = 0 \quad (28)$$

There is a jump of the tangential velocity when the flow passes through the bound vorticity disc. The tangential velocity at the disc should be the mean value of the tangential velocities at the two sides of the disc.

$$u_t(r_i, 0) = \frac{1}{2} [u_t(r_i, 0^-) + u_t(r_i, 0^+)] = -\frac{\Gamma_i}{4\pi r_i} \quad (R_i < r_i < R_{i+1}) \quad (29)$$

The same result was obtained for the planar rotor case by Branlard and Gaunaa (2015b) by evaluation of the contribution of  
 15 each component of the cylindrical vortex system to the tangential velocity. As for the planar rotor, the side view of a part of the vortex system of the non-planar rotor that was illustrated in Fig. 4 is shown in Fig. 6.

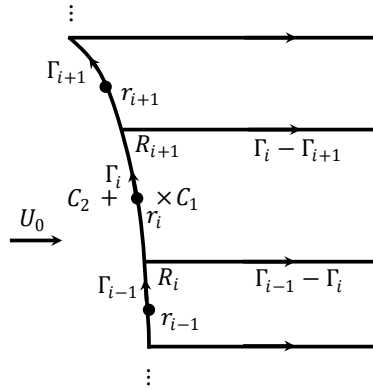

**Figure 6.** Side-view of a part of the axisymmetric vortex system of the non-planar rotor. The bound vorticity and trailed vorticity are highlighted. The two points of interest are marked with  $\times$  and  $+$ , which are just inside and outside the section  $i$ . The two circular contours of  $C_1$  and  $C_2$  pass through the two points of interest.

Similar as for the planar rotor case, consider the point  $\times$  in Fig. 6 with radial position of  $r_i$  that is between  $R_i$  and  $R_{i+1}$ , and is just inside the vortex cylinder. With the axisymmetry of the flow and the definition of the circulation in Eq. (25), the tangential velocity is derived to be identical to the planar rotor case in Eq. (27). It is important to point out that the net circulation through the contour ( $C_1$  or  $C_2$ ) is not influenced by the path of the circulation on either side of the contour.

5 For the point  $+$  that is just outside the vortex cylinder, the tangential velocity is derived to be zero and is identical to the planar rotor case in Eq. (28). Then, with the same argument as for the planar rotor, the tangential velocity at the curved bound vortex surface of the non-planar rotor should be the mean value of the tangential velocities at the two sides and is in identical form as that for the planar rotor case in Eq. (29).

### 3.5 Relationship between vortex cylinder model and momentum theory

10 The relationship between the vortex cylinder model and the momentum theory will be described separately for the planar rotor and the non-planar rotor.

#### 3.5.1 Planar rotor

For a planar rotor at a high tip-speed ratio, when excluding the contribution of drag to the momentum balancing for determining the induced velocities, the converged results from the momentum theory are equal to those from the vortex cylinder model (Branlard and Gaunaa, 2015a). As the tip-speed ratio decreases, results from [the](#) vortex cylinder model and basic 2-D momentum theory start differing, especially toward the rotor axis. As also shown in (Branlard and Gaunaa, 2015a), this difference stems from the pressure drop caused by centrifugal forces due to wake rotation, which is not included in the classic 2-D momentum framework that the BEM method is built on. The contribution of wake rotation to the thrust coefficient derived from the vortex cylinder model in Eq. (16) can be applied to the momentum theory as a modification to account for this effect (Branlard and Gaunaa, 2015a). When the wake rotation effect is included in the momentum theory, the annulus axial induced velocity as well as the tangential induced velocity from the momentum theory and the vortex cylinder model are identical. The radial induced velocity is available from the vortex cylinder model, but is not modelled in the momentum theory. However, for straight blades forming planar rotor, the radial induced velocity has no effect on the convergence calculation or the aerodynamic load calculation. This is because the radial velocity has no contribution to the projection of the velocity into the 2-D airfoil section for the straight, non-swept blades that are perpendicular to the rotor axis. These relationships can be written in the following mathematical form, where the subscript of VC represents the vortex cylinder model and the subscript of MT represents the momentum theory, the superscript of pl represents the planar rotor.

$$u_{a,MT} = u_{a,VC}^{pl} \quad (30a)$$

$$u_{t,MT} = u_{t,VC}^{pl} \quad (30b)$$

$$30 \quad u_{r,MT} \equiv 0 \quad (30c)$$

### 3.5.2 Non-planar rotor

For a non-planar rotor, the inductions from the momentum theory with wake rotation effect included are equivalent to the inductions from the vortex cylinder model for the corresponding planar rotor and excluding the radial induced velocity. This means the momentum theory equivalently assumes the rotor is planar when calculating inductions. Then, the vortex cylinder model for the non-planar rotor is equivalent to the momentum theory with the following corrections: For the annulus axial induced velocity, the correction is the difference of the results of the non-planar rotor and the corresponding planar rotor from the vortex cylinder model. The tangential induced velocity from both methods are the same, as described in Sect. 3.4.3. The radial induction is not available from the momentum theory, so the correction should be the complete radial induction of the non-planar rotor from the vortex cylinder model.

10 These relationships between the momentum theory and the vortex cylinder model for the non-planar rotor are summarized in the equations as follows, where the superscript of np represents the non-planar rotor.

$$u_{a,VC}^{np} = u_{a,MT} + \Delta u_a \quad (31a)$$

$$u_{t,VC}^{np} = u_{t,MT} \quad (31b)$$

$$u_{r,VC}^{np} = u_{r,MT} + \Delta u_r \quad (31c)$$

15 where the corrections are:

$$\Delta u_a = u_{a,VC}^{np} - u_{a,VC}^{pl} \quad (32a)$$

$$\Delta u_r = u_{r,VC}^{np} \quad (32b)$$

## 4 Some important aspects in models using blade element theory

Some important aspects of the implementation of the low-fidelity models that use blade element theory and rely on the 2-D airfoil data are briefly discussed. They are important for the load calculation and to get good agreement with the higher-fidelity models.

### 4.1 Impact of unsteady airfoil aerodynamics on steady state

For the blade with out-of-plane shapes, it is necessary to include the unsteady airfoil aerodynamics model (usually referred to as the dynamic stall model), even for the steady-state simulation. Otherwise, the results of the tangential forces will have a visible error. The reason originates from the conclusions of unsteady 2-D aerodynamics: the correct circulatory lift can be obtained if the magnitude of the effective angle of attack is determined at the three-quarter-chord point, but the direction of it should be determined by the velocity at the quarter-chord point (Gaunaa, 2002; Bergami and Gaunaa, 2012). For the low-fidelity model using blade element theory, the angle of attack is usually determined at only one calculation point per section. For instance, for the BEM module in the HAWC2 code, it corresponds to the three-quarter-chord point. The direction of the circulatory lift is then equivalently transformed to perpendicular to the velocity at the quarter-chord point by including an

additional torsion rate drag that is proportional to the circulatory lift. In addition, the non-circulatory part of the lift force should be correctly included. For the blade with out-of-plane shapes, even when the rotational speed is constant, the mid-chord point will experience a component of acceleration that is perpendicular to the chord due to the projection of centrifugal acceleration. In addition, the angular velocity vector will also have a projection in the 2-D section that will result in an effective pitching motion of the airfoil section. The contribution of both the mid-chord acceleration and the torsion rate should be included when calculating the aerodynamic force. For details, see the reports by Hansen et al. (2004) and Pirrung and Gaunaa (2018).

#### 4.2 Curved blade length projection correction

For blades with in-plane or out-of-plane shapes, the curved blade length in an elementary annulus ( $ds$ ) is different from the change of the radius ( $dr$ ). Then, for the momentum analysis in a stream-tube, it is necessary to multiply the local thrust and torque coefficient with the term of  $\frac{ds}{dr}$  to account for this difference (Madsen et al., 2020a). For the Kutta-Joukowski analysis of the non-planar rotor in Eq. (5), the term of  $\frac{ds}{dr}$  is already included in the equation of force. So, it is not necessary to include this term again in the thrust coefficient in Eq. (22) during the convergence calculation using the vortex cylinder model.

### 5 Blade element theory with vortex cylinder model

The BEM method is the blade element theory coupled with the momentum theory. Similarly, the vortex cylinder model should be coupled with the blade element theory for the aerodynamic load calculation of a rotor with finite number of blades. The link between the blade element theory and the vortex cylinder method is the relationship of the blade bound circulation and the trailed vorticity strength of the vortex cylinder. The trailed vorticity strength is calculated from the total bound circulation of the two neighbouring sections using Eq. (24). The total bound circulation is calculated from the blade bound circulation and assuming all blades have the same bound circulation strength.

$$\Gamma_i = N_B \Gamma_i^B \quad (33)$$

The blade bound circulation is calculated from the circulatory part of the lift coefficient  $C_L^C$ . For quasi-steady simulations, the circular part of the lift coefficient can be replaced by the quasi-steady lift coefficient  $C_L^{QS}$ .

$$\Gamma^B = \frac{1}{2} V_{rel} c C_L^C \quad (34)$$

In this section, the coupling of the vortex cylinder model and the blade element theory will be firstly described in Sect. 5.1. The application of the tip-loss factor for the non-planar rotor is important, and is described in Sect. 5.2. Finally, the implementation of the proposed vortex cylinder model is summarized in Sect. 5.3.

#### 5.1 Vortex cylinder model as a correction to BEM or as the full model

According to the relationship between the momentum theory and the vortex cylinder model described in Sect. 3.5, there are two possible methods of using the vortex cylinder model when coupling with the blade element theory. Firstly, the vortex

cylinder model can be used as a modification to the existing BEM model, which is named and labelled as BEM-VC model. Otherwise, the vortex cylinder model can be considered as the complete replacement of the [momentum theory in the](#) BEM method. With the blade element theory coupled with the vortex cylinder model, we have the blade element vortex cylinder (BEVC) model, which does not include any momentum theory results. The reader may argue that the BEVC model should completely replace the BEM model for the prediction of the aerodynamic loads in an existing aeroelastic code. As a first step, the authors recommend the use of the vortex cylinder model as a correction to the BEM method (BEM-VC). This is because the framework of the BEM method with many sub-models and corrections has been implemented in the aeroelastic codes and has been intensively tested.

## 5.2 Tip-loss correction

Prandtl's tip-loss factor is commonly applied to the BEM method to account for the difference between a finite number of blades and the assumption of infinite number of blades in the momentum theory (Glauert, 1935; Sørensen, 2015). Similarly, the vortex cylinder model also assumes infinite number of blades. Also, considering the relationship between the momentum theory and the vortex cylinder model discussed in the previous sections, a tip-loss correction should be applied to the vortex cylinder model. The tip-loss factor  $F$  presented by Glauert (1935) was implemented in the BEM module in the HAWC2 code (Madsen et al., 2020a):

$$F = \frac{2}{\pi} \cos^{-1} \left( \exp \left( -\frac{N_B}{2} \frac{R_{\text{tot}} - r}{r \sin \varphi} \right) \right) \quad (35)$$

where  $\varphi$  is the inflow angle.

The tip-loss correction is applied by scaling the thrust coefficient with the inverse of the tip-loss factor when calculating the blade axial induction.

$$a_B^{\text{pl}} = f_{a-C_T} (C_{T,\text{eff}}/F) \quad (36)$$

where the subscript  $B$  indicates the induction at the blade.

### 5.2.1 Tip-loss for non-planar rotor

Care should be taken when applying the tip-loss correction to the non-planar rotor. The first aspect is the angle to use when calculating the tip-loss factor in Eq. (35). The inflow angle in the rotor coordinate system, which is the flow angle seen by the rotor plane, is usually used (Madsen et al., 2020a). Another possible choice is the flow angle in the sectional coordinate system, which is the flow angle seen by the 2-D airfoil section. For planar rotors, it is not necessary to distinguish between them because they are identical. Since the tip-loss factor is developed for planar rotors, it is not possible to analytically show which one is better than the other when applied to non-planar rotors. In a preliminary numerical investigation that is not reported in the present work, it was discovered that results when using the sectional flow angle to calculate the tip-loss factor are in slightly better agreement with the higher-fidelity models compared to using the inflow angle. As a result, the sectional flow angle is recommended when calculating the tip-loss factor, and is used in the BEM-VC method when calculating the results in Sect. 7.

The second aspect is that the tip-loss factor is only to model the amplified axial induction at the blade compared to the annulus-averaged axial induction, it should not directly change the trailed (tangential or longitudinal) vorticity strength of the vortex cylinders. Recall the similarity of the vortex cylinder model for the non-planar rotor and the corresponding planar rotor with the same circulation distribution described in Sect. 3.4. The correct implementation of the tip-loss correction in the vortex  
5 cylinder model for the non-planar rotor could be considered as a two-step approach.

In the first step, the axial induction factor at the blade of the corresponding planar rotor with the tip-loss correction is calculated using Eq. (36). The second step is to calculate the difference between the annulus axial induction of the non-planar rotor and the planar rotor using the vortex cylinder model. From the effective thrust coefficient, the annulus-averaged axial induction factor of the planar rotor is calculated.

$$10 \quad a_{\infty}^{\text{pl}} = f_{a-C_T}(C_{T,\text{eff}}) \quad (37)$$

where the subscript  $\infty$  represent infinite number of blades or annulus-averaged value.

The tangential vorticity of the vortex cylinder is calculated from the annulus axial induction of the planar rotor  $a_{\infty}^{\text{pl}}$  using Eq. (20) and is duplicated here with the update notation.

$$\gamma_{t,i}^{\text{np}} = \gamma_{t,i}^{\text{pl}} = 2U_0(a_{\infty,i}^{\text{pl}} - a_{\infty,i-1}^{\text{pl}}) \quad (38)$$

15 Then, the annulus axial induction factor of the non-planar rotor  $a_{\infty}^{\text{np}}$  can be calculated using Eq. (9). Finally, the axial induction at the blade section  $i$  of the non-planar rotor is then equal to the sum of the blade axial induction of the planar rotor and the difference of the annulus axial induction of the non-planar rotor and the planar rotor.

$$a_B^{\text{np}} = a_B^{\text{pl}} + a_{\infty}^{\text{np}} - a_{\infty}^{\text{pl}} \quad (39)$$

The tip-loss factor is only applied to the axial induction but not applied to the tangential or radial induction, which is  
20 following the application of the tip-loss correction in the BEM module in the HAWC2 code.

### 5.2.2 Erroneous implementation

If the model is used without clearly distinguishing between the axial induction on the blade and the annulus-averaged axial induction, the resulting system closure could be wrong. If using the blade axial induction factor  $a_B^{\text{pl}}$  instead of the annulus axial induction factor  $a_{\infty}^{\text{pl}}$  to calculate tangential vorticity in Eq. (38), the tangential vorticity will be directly scaled by the tip-loss  
25 factor, which is unphysical. Then, the annulus axial induction and the radial induction calculated using Eqs. (9) and (10) will be directly scaled by the tip-loss factor due to the wrong tangential vorticity.

For the planar rotor with straight blades, the calculated aerodynamic loads on the blade using the erroneous method will still be correct. The tangential vorticity from the erroneous method is wrong and the radial induction calculated using Eq. (10) will then be wrong. However, the blade axial induced velocity and the tangential induced velocity are correctly calculated. In  
30 addition, the radial induction has no contribution to the aerodynamic loads because it has no contribution to the flow seen by the 2-D section when the blade is straight and the rotor is planar, as described in Sect. 3.5.1.



### 5.2.3 Other implementation of tip-loss correction

The tip-loss correction used in the present work is scaling the thrust coefficient when calculating the blade axial induction and is actually only applied to the planar part of the axial induction. There are other definitions of the tip-loss factor, such as the ratio of the blade axial induction and the annulus-averaged axial induction (Branlard and Gaunaa, 2014). Then, it is possible to  
5 directly utilize the tip-loss factor as:

$$F = \frac{a_{\infty}^{\text{np}}}{a_B^{\text{np}}} \quad (40)$$

However, consider that the tip-loss factor is originally developed for planar rotors. As in Prandtl's simple model of system of material sheets, the flow will go around the vortex disc edges. Also for the modern definition of the tip-loss factors (Branlard and Gaunaa, 2014), planar rotor disc is always assumed. Then, the method of directly applying Prandtl's tip-loss factor in Eq. (35)  
10 to the non-planar axial induction as in Eq. (40) is then without a clear physical background and thus not recommended.

### 5.3 Algorithm of proposed vortex cylinder models

As has been described previously in this section, the proposed vortex cylinder model can be used in two ways: either as a correction to the BEM method (BEM-VC) or is solely used and coupled with the blade element theory (BEVC). Details of the implementation of both methods have been described previously in this work, and are summarized in Algorithm 1.

---

**Algorithm 1** Overview of the proposed BEM-VC / BEVC method

---

**for** each time step **do**

**for** each blade section **do**

    Calculate the angle of attack  $\alpha$  at the three-quarter-chord point using:

      section velocity, deflection, pitch angle, torsion rate, twist, induced wind and free wind

    Compute the quasi-steady lift coefficient  $C_L^{QS}$  and drag coefficient  $C_D^{QS}$  using the airfoil look-up table

**BEVC model:**

      Calculate the bound circulation strength  $\Gamma^B$ , Eq. (34)

      Calculate the Kutta-Joukowski thrust coefficient  $C_{T,KJ}$ , Eq. (22)

**BEM-VC model:**

      Compute the curved blade length projection correction  $\frac{ds}{dr}$  (Madsen et al., 2020a, Eq. (32))

      Calculate the thrust coefficient  $C_{T,MT}$  and torque coefficient  $C_Q$  of each stream tube by projecting the lift and possibly the drag with respect to the rotor plane, see Madsen et al. (2020a). The  $\frac{ds}{dr}$  term should be included

**Comment:**  $C_{T,MT} = C_{T,KJ}$  when drag is excluded in the momentum balancing

**end for**

**for** each blade section, from most outboard towards inboard **do**

**Optional:** Compute thrust coefficient due to wake rotation, Eq. (16)

  Compute the effective thrust coefficient of the annulus  $C_{T,eff}$ , Eq. (14)

  Divide  $C_{T,eff}$  by the tip-loss factor  $F$  in Eq. (35) to get the scaled thrust coefficient:  $C_{T,eff}/F$

**BEVC model:**

    Compute the blade axial induction factor of the corresponding planar rotor  $a_B^{pl}$  using the scaled thrust coefficient  $C_{T,eff}/F$ , Eq. (21)

**BEM-VC model:**

    Compute the blade axial induction factor  $a_{BEM}$  as in BEM method, using the scaled thrust coefficient  $C_{T,eff}/F$ , Eq. (21)

**Comment:**  $a_{BEM} = a_B^{pl}$  when drag is excluded in the momentum balancing

  Compute the annulus induction factor of the corresponding planar rotor  $a_\infty^{pl}$  using the thrust coefficient  $C_{T,eff}$ , Eq. (21)

  Compute the strength of the tangential vorticity  $\gamma_t$  using  $a_\infty^{pl}$ , Eq. (38)

  Compute the annulus axial induction of the non-planar rotor  $a_\infty^{np}$ , based on Eq. (9)

  Compute the blade axial induction of the non-planar rotor  $a_B^{np}$ , Eq. (39)

  Compute the tangential induced velocity  $u_t$ , Eq. (29)

  Compute the radial induced velocity  $u_r$ , Eq. (10)

**end for**

**for** each blade section **do**

  Compute aerodynamic forces including dynamic stall and Theodorsen effects (Hansen et al., 2004; Pirrung and Gaunaa, 2018)

**end for**

**end for**

---

## 6 The models for comparison

The higher-fidelity models for the comparison are the Navier-Stokes solver EllipSys3D (Michelsen, 1992, 1994; Sørensen, 1995) and the lifting-line module in the aerodynamic solver MIRAS (Ramos-García et al., 2016), both developed at the Technical University of Denmark (DTU). The lower-fidelity aerodynamic models used for comparison are the BEM method, the BEM method with radial induction correction by Madsen et al. (2020a) (BEM- $u_r$ ) and the proposed BEM-VC method. Details of these model setups are given in this section.

### 6.1 Navier-Stokes solver

The pressure-based incompressible three-dimensional solver EllipSys3D was used to solve the Reynolds-Averaged Navier-Stokes equations, using a finite volume discretization. An inlet/outlet strategy was followed for the boundary conditions of the outer limit of the CFD domain. The flow was assumed to be fully turbulent, and the  $k-\omega$  SST model (Menter, 1994) was employed. These higher-fidelity simulations are labelled in the present work as CFD.

Several rotor-resolved meshes were built. They were generated in two consecutive steps, that were fully scripted in order to ensure a similar resulting grid quality. First, a structured mesh of the blade surface was generated with the openly available Parametric Geometry Library (PGL) tool (Zahle, 2019). A total of 128 cells were used in the spanwise direction, and the chordwise direction was discretized with 256 cells. Secondly, the surface mesh was radially extruded with the hyperbolic mesh generator Hypgrid (Sørensen, 1998) to create a volume grid. A total of 256 cells were used in this process, and the resulting outer domain was located at approximately 11 rotor diameters. A boundary layer clustering was taken into account, with an imposed first cell height of  $1 \times 10^{-6}$  m, in order to target  $y^+$  values lower than unity. The resulting volume meshes accounted for a total of 14.2 million cells. The grid topology is illustrated in Fig. 7, through the particular case of the baseline straight blade.

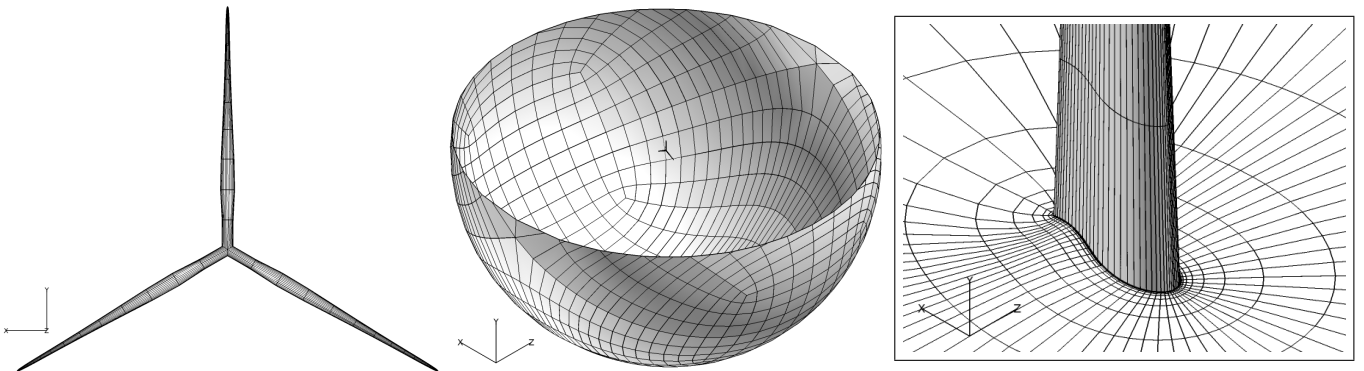

**Figure 7.** Visualization of straight blade CFD mesh. Left: blade surface mesh (for clarity, only 1 out of 16 grid lines shown). Middle: lower half of outer domain surface mesh (1 out of 16 grid lines). Right: detail of volume mesh, cut at mid-span (1 out of 8 grid lines).

While a steady solver was used, unsteady separation is expected near the root of the wind turbine blade in operation. To mitigate the effects that this can have on the conclusions of the present work, all the CFD quantities were averaged for the last 350 iterations.

## 6.2 Lifting-line solver

5 The lifting-line module in the aerodynamic solver MIRAS (Ramos-García et al., 2016) is implemented as a time-marching approach and uses the 2-D airfoil data. This work uses a modified version of the lifting-line module that includes the influence of the curved bound vortex on the induced velocity as described by Li et al. (2020) which is labelled as LL-mod in that work. The bound vorticity is located at the quarter-chord line and the calculation points are placed on the three-quarter-chord line. The influence of the curved bound vortex is modelled by adding the difference of the induced velocity due to the 3-D bound  
10 vorticity and an imaginary 2-D bound vorticity (infinitely long line vortex) evaluated at the three-quarter-chord point to the induced velocity of the blade section (Li et al., 2020). The curved bound vortex influence is assumed to be constant along the chord. The angle of attack to determine the circulatory lift and drag coefficient is the angle of attack at the three-quarter-chord point. The flow environment to determine lift and drag, especially the direction of the lift and drag force, is at the quarter-chord point. In addition, as the discussion in Sect. 4.1, the non-circulatory lift is included in the lifting-line model when  
15 calculating the aerodynamic forces. For the setup in this study, each blade is discretized into 50 sections with cosine spacing. Each simulation is calculated for 20 thousand time steps and each step correspond to  $1.5^\circ$  of azimuthal angle, resulting in a total of 83.3 revolutions. The airfoil data is from 2-D fully turbulent CFD results (Bortolotti et al., 2019). The vortex core size in the calculations is 0.1% of the local chord length. The first row of trailed vorticities begins from the trailing edge of the blade.

## 20 6.3 Low-fidelity models

Three low-fidelity aerodynamic models are used for the comparison. The first one is the BEM method implemented in the HAWC2 code version 12.8 (Larsen and Hansen, 2007). The second one is the BEM method with radial induction correction in Eq. (6) (BEM- $u_r$ ) in the same version of HAWC2 code, and is described by Madsen et al. (2020a). The third one is the BEM-VC method proposed in this work and is implemented in a test version of the HAWC2 code based on version 12.8. As  
25 has been discussed in Sect. 5.1, the proposed BEM-VC method utilizes the vortex cylinder model as a correction to the existing BEM method. The results should be identical to the BEVC model when the drag is excluded in the momentum balancing. So, the results from the BEVC model, which solely uses the vortex cylinder model and not directly uses the momentum theory, are not shown. For the low-fidelity models in the HAWC2 code, each time step corresponds to 0.01 s and each simulation is calculated for 700 s to get the steady-state value. Each blade is discretized radially into 80 sections. The airfoil data is also  
30 from 2-D fully turbulent CFD results and is identical to those used in the lifting-line method. As has been described in Sect. 5.2, the flow angle seen by the airfoil section is used to calculate the tip-loss factor for the BEM-VC method. For the BEM method and BEM- $u_r$  method, the original implementation of the tip-loss factor in the HAWC2 code using the inflow angle is

applied. Since all three low-fidelity models are implemented in the HAWC2 code, it is then guaranteed the transformation of the velocity and force between different coordinate systems during the computation is consistent.

## 7 Results

In this section, the distributed aerodynamic load in the ~~out-of-plane and in-plane~~ axial and tangential direction, as well as the integrated loads of aerodynamic thrust and power from different low-fidelity models, are compared with results from higher-fidelity models. The axial and tangential loads are defined to be positive when aligned with  $x$ - and  $z$ -coordinate respectively as defined in Fig. 1. The higher-fidelity models are the Navier-Stokes solver (CFD) and the lifting-line method (LL) as described in Sect. 6. By comparing the results from the three low-fidelity models with higher-fidelity models, it will be highlighted to which extent the influence of the non-planar rotor geometry can be correctly modelled by each of the lower-fidelity models.

### 7.1 Test cases

There are five different wind turbine blades used for the comparison, all of them are based on the IEA-10.0-198 10 MW reference wind turbine (RWT) (Bortolotti et al., 2019). The baseline straight blade is modified by aligning the half-chord line to a straight main-axis. For the upwind dihedral blades, the main-axes that determine the planforms are obtained from modified Bézier curves which are parameterized with: dihedral ratio  $\bar{r}_s$ , dihedral magnitude  $\Delta d$  and tip dihedral angle  $\Lambda_{tip}$ . In addition, some cases with large cone angles are applied to these dihedral blades to exploit the range of capability of the models. The radius of the uncone rotor is 99 m, of which the hub radius is 2.8 m. The parameterization of the dihedral blades is very similar to that for the previous study of swept blades (Li et al., 2018). The dihedral blades W-1 to W-4 are corresponding to Blade-1 to Blade-4 in the previous study, but with out-of-plane shapes (dihedral) instead of in-plane shapes (sweep). The blades are assumed to be stiff, which means the effect of elastic deformation is not included. In addition, the pitch angle is zero for all test cases.

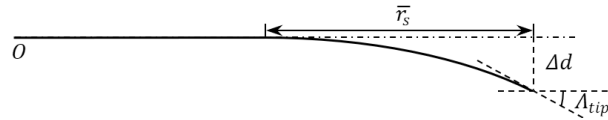

**Figure 8.** The parameterization of the dihedral blade with dihedral ratio  $\bar{r}_s$ , dihedral magnitude  $\Delta d$  and tip dihedral angle  $\Lambda_{tip}$ . The figure is from (Li et al., 2018) but the definition of the parameters are modified.

The parameters of these upwind dihedral blades are summarized in Table 1. The main-axes of these dihedral blades are illustrated in Fig. 8. The purpose of having dihedral blades with different dihedral magnitude and different tip dihedral angle is to represent different possible shapes of the dihedral blades.

The airfoils are aligned perpendicular to the curved main-axis, which is the half-chord line. The chord and twist distribution of the dihedral blades remain unchanged compared to the baseline straight blade. The radius of the dihedral blades are identical to that of the baseline straight blade, but the curved blade length is increased due to the dihedral. For the simulations in this

section, the uniform inflow of  $8 \text{ m s}^{-1}$  with no yaw error is applied to the rotor with a constant rotational speed of  $0.855 \text{ rad s}^{-1}$ . For the unconed rotors, the tip-speed ratio is 10.58. At this operational condition, the thrust coefficient of the unconed rotor with baseline straight blades is 0.90 and the rotor power coefficient is 0.46, as predicted using the BEM method. At a radius of 70 m, the angle of attack predicted by the BEM method is  $5.76^\circ$ .

**Table 1.** The parameters of the planforms of the four upwind dihedral blades used for the comparison.

| Name | Dihedral ratio $\bar{r}_s$ | Dihedral magnitude $\Delta d$ | Tip dihedral angle $\Lambda_{tip}$ |
|------|----------------------------|-------------------------------|------------------------------------|
| W-1  | 50%                        | 10%                           | $20^\circ$                         |
| W-2  | 50%                        | 10%                           | $40^\circ$                         |
| W-3  | 25%                        | 5%                            | $20^\circ$                         |
| W-4  | 25%                        | 5%                            | $40^\circ$                         |

5

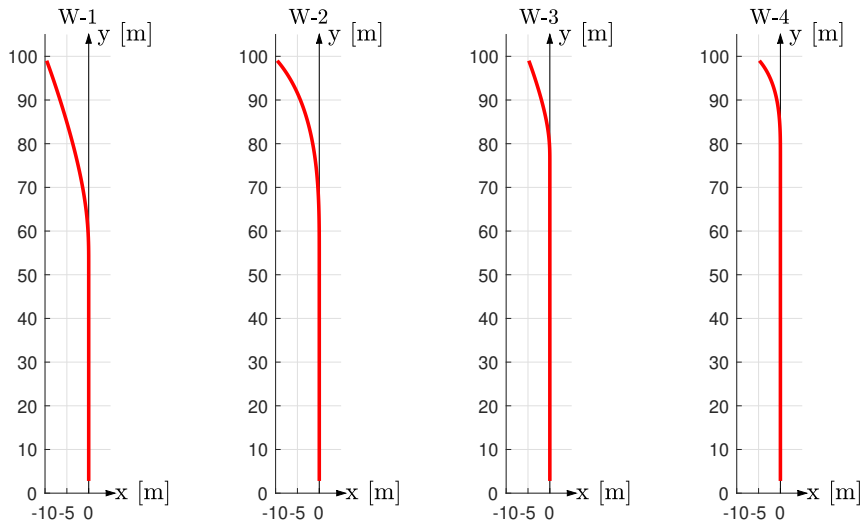

**Figure 9.** Side-view of the main-axes of the four different upwind dihedral blades used for the comparison. The dihedral blades from left to right are W-1 to W-4.

## 7.2 The distributed load

For the test cases described in Sect. 7.1, the distributed aerodynamic loads calculated from different aerodynamic models are summarized and are compared in this section. For the calculation of the aerodynamic loads, both lift and drag force are included. In this study, the focus is on the influence of blade dihedral on the loads. The near-root region (i.e. up to an approximate radius of 20 m), experienced flow separation in the CFD solution, and it is not the focus of this study.

### 7.2.1 Baseline blade with zero cone

Firstly, the steady-state results of the baseline straight blade without cone calculated from different models are compared and plotted in Fig. 10. Please note that the distributed loads plotted from all models are corresponding to aerodynamic force per unit radius. The three BEM methods give identical results as expected. The results from the higher-fidelity models are similar to the results from the BEM models.

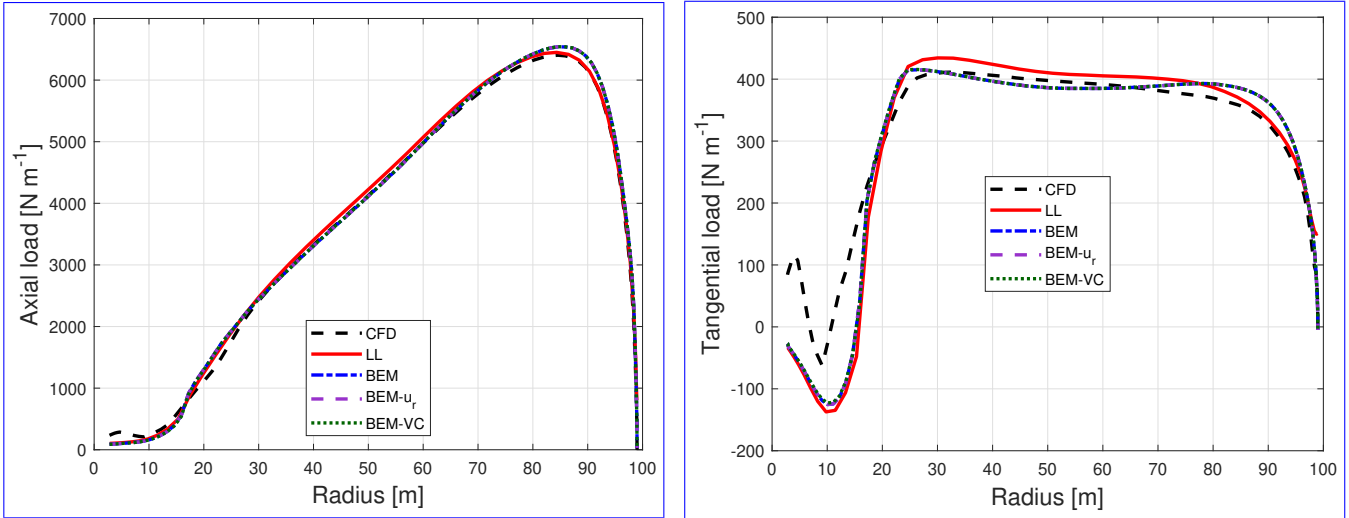

**Figure 10.** Comparison of out-of-plane axial load (left) and in-plane tangential load (right) of the baseline straight blade calculated from CFD, lifting-line method (LL), BEM method, BEM with radial induction (BEM- $u_r$ ) and the proposed BEM-VC method. The results from three BEM variants coincide with each other as expected.

5

### 7.2.2 Dihedral blade with zero cone

The steady-state results of the different upwind dihedral blades with zero cone angle are calculated with different aerodynamic models. The out-of-plane load and in-plane axial load and tangential load of the dihedral blade W-1 is shown in Fig. 11. The distributed loads correspond to aerodynamic force per unit radius, the curved blade length projection correction described in Sect. 4.2 is applied.

10

Comparing the distributed load of the baseline straight blade and the dihedral blade W-1, it is difficult to draw conclusions for the out-of-plane axial load or the in-plane tangential load, because no clear trends can be seen. In order to clearly show the influence of the dihedral on the loads predicted by different aerodynamic models, the difference of the loads of the dihedral blade W-1 with respect to the baseline straight blade are shown in Fig. 12. This is done by directly subtracting the load of the baseline straight blade from the load of the dihedral blade for the same radius. Consistently to this remark, the following comparisons throughout this work only include the difference of the distributed loads. The absolute loads are not shown since it is more difficult to draw conclusions from them.

15

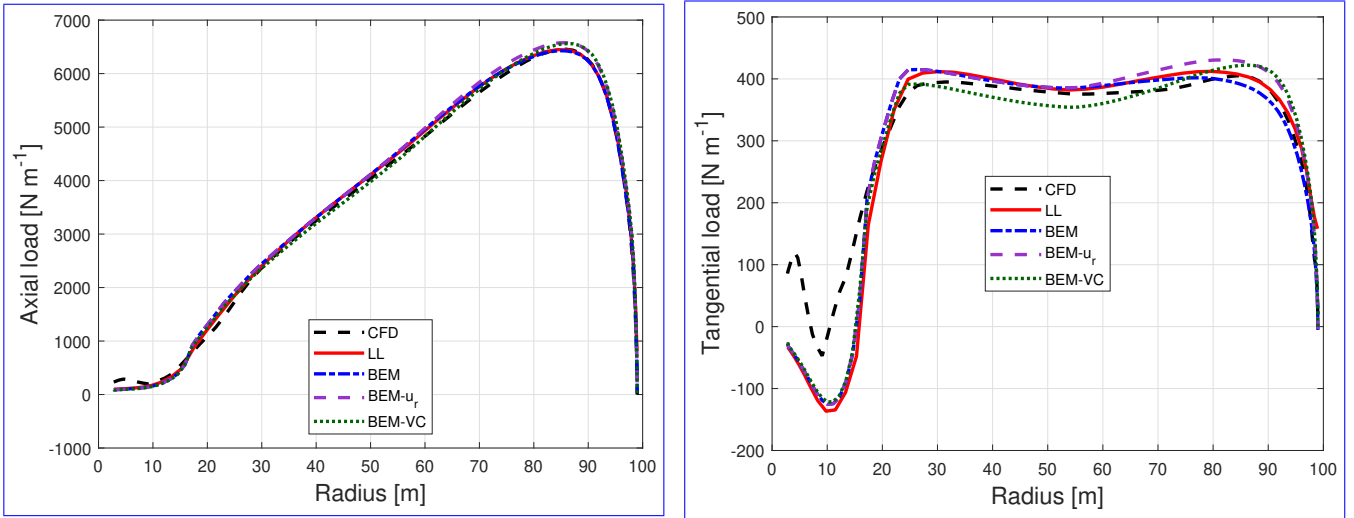

**Figure 11.** Comparison of out-of-plane axial load (left) and in-plane tangential load (right) of the dihedral blade W-1 calculated from CFD, lifting-line method (LL), BEM method, BEM with radial induction (BEM- $u_r$ ) and the proposed BEM-VC method.

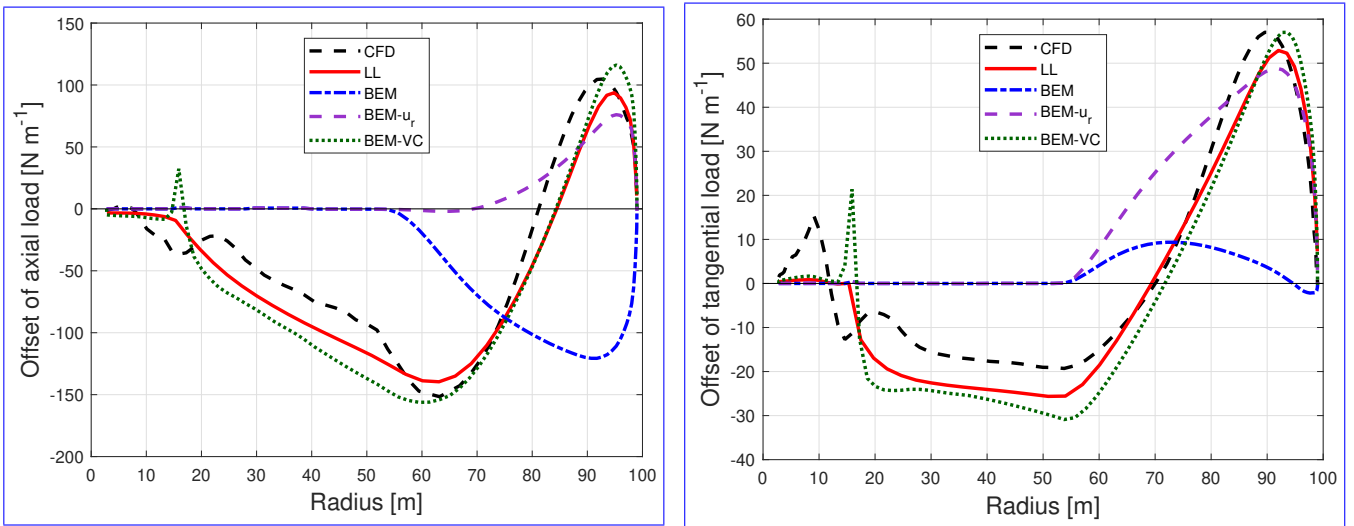

**Figure 12.** Comparison of the difference of the out-of-plane axial load (left) and in-plane tangential load (right) of the dihedral blade W-1 compared to the baseline blade calculated from CFD, lifting-line method (LL), BEM method, BEM with radial induction (BEM- $u_r$ ) and the proposed BEM-VC method.



It can be seen that for the difference of both the ~~out-of-plane and in-plane axial and tangential~~ load, both higher-fidelity models (CFD and LL) predict a fairly similar pattern of spanwise load redistribution. For the spanwise location that is further inboard compared to where the blade starts to dihedral, the ~~out-of-plane and in-plane axial and tangential~~ loads of the upwind dihedral blade are lower compared to the baseline straight blade. When moving from the spanwise location where the blade starts to dihedral towards halfway until the blade tip, both ~~out-of-plane and in-plane axial and tangential~~ loads are also lower compared to the baseline. When moving further towards the tip, both ~~out-of-plane and in-plane axial and tangential~~ loads are then increased compared to the baseline until the blade tip.

A similar pattern of spanwise load redistribution was also observed for swept blades in the previous works (Li et al., 2018, 2020, 2021). However, the redistribution of the loads only takes place where the blade is swept. The loads of the swept blade and the straight blade are almost identical for the inboard part of the blade, where the blade is still straight. Instead, for the dihedral blade, the influence of the blade dihedral has a pronounced influence on the inboard part of the blade that is still straight. This means the blade dihedral at the outboard part of the blade has an influence throughout the spanwise locations of the blade instead of only on the part of the blade that has dihedral. This could be explained by the out-of-plane blade shape moving the starting position of the trailed vortex system in the axial direction. That, in turn, could effectively move the inner parts of the rotor further into or out of the induction field created by the vortex sheets trailed from the outer sections. By contrast, the influence of blade sweep on the trailed vortex is only on the azimuthal starting position of the trailed vortex. If we consider the trailed vortex as a frozen helical wake, sweeping the blade would only result in an azimuthal twisting of the helical wake. Therefore, the shape of the vortex wake would almost remain unchanged, so that the influence on the induction would not be global.

For both the ordinary BEM method and the BEM method with radial induction correction (BEM- $u_r$ ), the influence of blade dihedral is not correctly predicted. For the inboard part of the blade that has no dihedral, both methods predict zero offset of loads. The BEM method predicts lowered ~~out-of-plane axial~~ load for the entire portion of the blade that has dihedral. For the ~~in-plane tangential~~ load, the BEM method predicts neglectable differences compared to the baseline straight blade. The performance of the BEM method is as expected because of the assumption of radially independence in the stream tube theory and the changed streamwise starting position of the trailed vorticity due to blade dihedral is not modelled. The BEM- $u_r$  method is able to predict the increase of the load near the tip, for both ~~out-of-plane and in-plane axial and tangential~~ loads. However, the decrease of the loads near where the blade starts to dihedral and also further inboard is not predicted. Because for the BEM- $u_r$  method, the radial dependency is modelled to a limited extent and is only on the radial induction but not on the axial induction (Madsen et al., 2020a). In addition, the axial and radial induction from the BEM- $u_r$  method corresponds to a planar rotor.

In comparison, the proposed BEM-VC method correctly predicts the pattern and the magnitude of the load redistribution for both ~~out-of-plane and in-plane axial and tangential~~ loads. The decrease of the loads further inboard compared to where the blade starts to dihedral is also well predicted. It should be highlighted that the spanwise location of the crossing of the zero load difference is also in good agreement with the results from higher-fidelity models (CFD and LL). The largest error with the BEM-VC method is mainly for the tip-most part: the increase of the load is over-predicted for both ~~out-of-plane and in-plane axial and tangential~~ loads. This could be due to the use of Prandtl's tip-loss correction in the model. This model is

based on a wake shape corresponding to that from a planar rotor with straight blades. The authors believe that a more advanced aerodynamic model that can replace the current tip-loss correction, if coupled with the proposed vortex cylinder model, could have better agreement with higher-fidelity models. An example is the near-wake model (Madsen and Rasmussen, 2004; Pirrung et al., 2017) which approximately models the near-wake as the helical trailed vorticity and is currently coupled with a far-wake model that is based on the momentum theory.

It should be mentioned that the difference between the higher-fidelity models (CFD and LL) and the BEM-VC method for the baseline straight blade is of similar magnitude as the influence due to blade dihedral. However, since the model predicts the sensitivity of changes in dihedral relatively well, it is favourable to be used for parameter studies and to be eventually integrated in a multi-fidelity aerodynamic optimization framework. For example, in order to design a rotor with dihedral blades, higher-fidelity models could be used for the initial design of a straight blade. Then, the proposed vortex cylinder model could be used to explore the sensitivity of different dihedral parameters on the aerodynamic loads, with a relatively low computational effort.

The results of the other three upwind dihedral blades are shown in Appendix B1. The same conclusions as that for the blade W-1 also hold for these results.

### 7.2.3 Upwind cone

To exploit the range of validity of the proposed method, a large upwind cone of  $15^\circ$  is applied to the baseline straight blade as well as the blades with upwind dihedral (W-1 to W-4). For the coned cases, the radius of the rotor will decrease compared to the radius of the rotor having the same blades but with zero cone. For better comparison, the abscissa in the figures correspond to the radius of the blade without cone, and the loads are defined as force per unit radius. The factor of  $\frac{ds}{dr}$ , which now equals to the secant of the sum of the cone angle ( $\theta_c$ , positive when cone up-wind) and the dihedral angle  $\kappa$ , is multiplied to the loads of the coned blades.

$$\frac{ds}{dr}(r_i) = \frac{1}{\cos(\kappa_i + \theta_c)} \quad (41)$$

For the baseline straight blade with  $15^\circ$  of cone upwind, the difference of the loads compared to the straight blade without cone is plotted in Fig. 13. For the upwind dihedral blades with  $15^\circ$  of cone further upwind, the difference of the loads compared to the baseline blade with the same upwind cone angle are calculated. The results of the upwind coned dihedral blade W-1 is shown in Fig. 14 in this section. The results of the other dihedral blades with further upwind cone are summarized in Appendix B2.

For the straight blade with large cone in Fig. 13, the results from the proposed method are in good agreement with the results from higher-fidelity models (CFD and LL). The proposed method predicts the same trends as the higher-fidelity models while the BEM method and BEM- $u_r$  method predict different trends. For the upwind dihedral blades with large cone angle in Fig. 14 and in Appendix B2, the results from the proposed method are also in better agreement with the higher-fidelity model compared to the BEM method and BEM- $u_r$  method. However, the results from the proposed method are having some

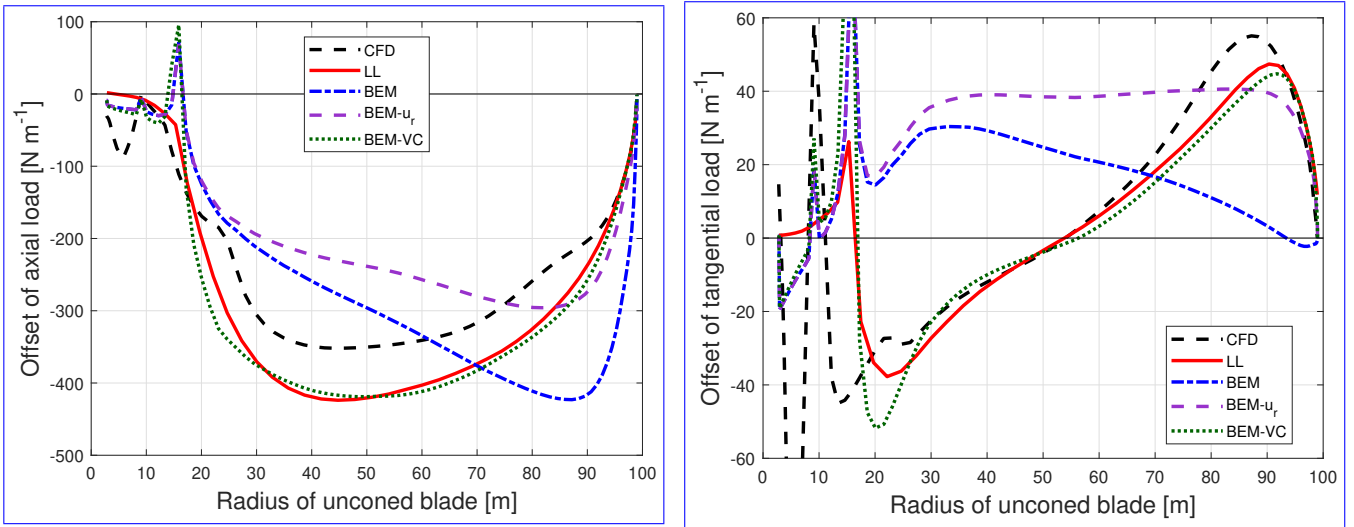

**Figure 13.** Comparison of the difference of the out-of-plane axial load (left) and in-plane tangential load (right) of the baseline blade with  $15^\circ$  of cone upwind compared to the baseline blade without cone calculated from CFD, lifting-line method (LL), BEM method, BEM with radial induction (BEM- $u_r$ ) and the proposed BEM-VC method.

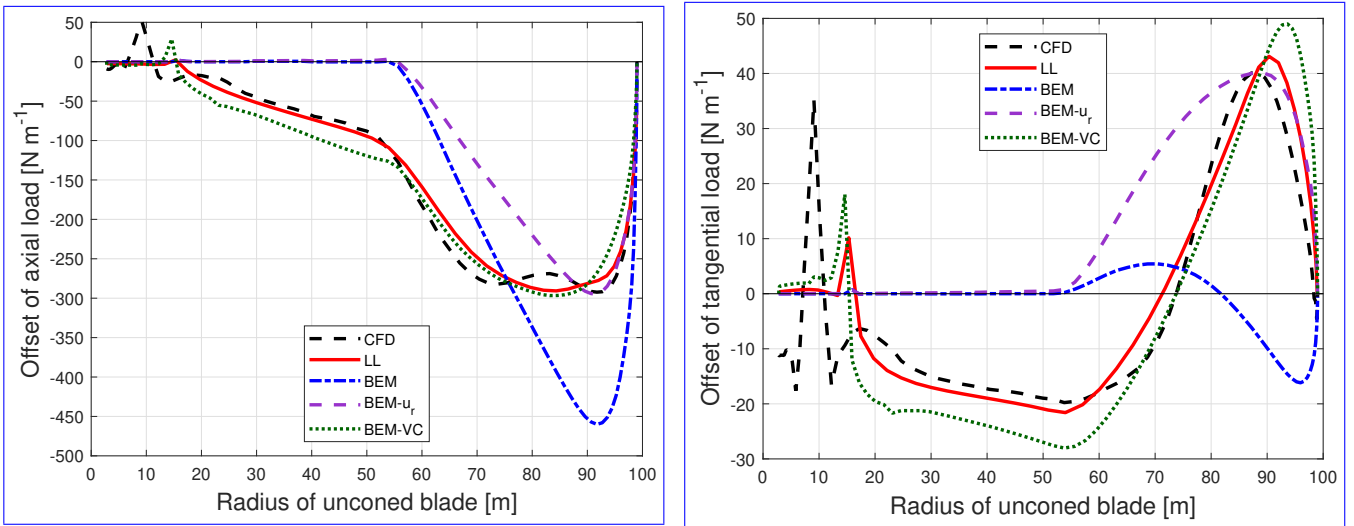

**Figure 14.** Comparison of the difference of the out-of-plane axial load (left) and in-plane tangential load (right) of the dihedral blade W-1 with  $15^\circ$  of cone upwind compared to the baseline blade with the same cone calculated from CFD, lifting-line method (LL), BEM method, BEM with radial induction (BEM- $u_r$ ) and the proposed BEM-VC method.

differences compared to the higher-fidelity model probably due to the limitation of the current tip-loss correction, especially near the blade tip that has large blade dihedral.

#### 7.2.4 Downwind cone

To further exploit the range of validity of the proposed method, a large downwind cone angle of  $15^\circ$  is applied to the baseline straight blade as well as the blades with upwind dihedral (W-1 to W-4). As has been discussed, the radius of the coned rotor will change compared to the radius of the rotor with the same blades but without cone. For better comparison, the abscissa of the figures correspond to the radius of the blade without cone, and the loads are again defined as force per unit radius. The term of  $\frac{ds}{dr}$  calculated from Eq. (41) should be multiplied to the loads of the coned blades. For the downwind-coned straight blade, the difference of the loads compared to the baseline straight blade without cone is plotted in Fig. 15.

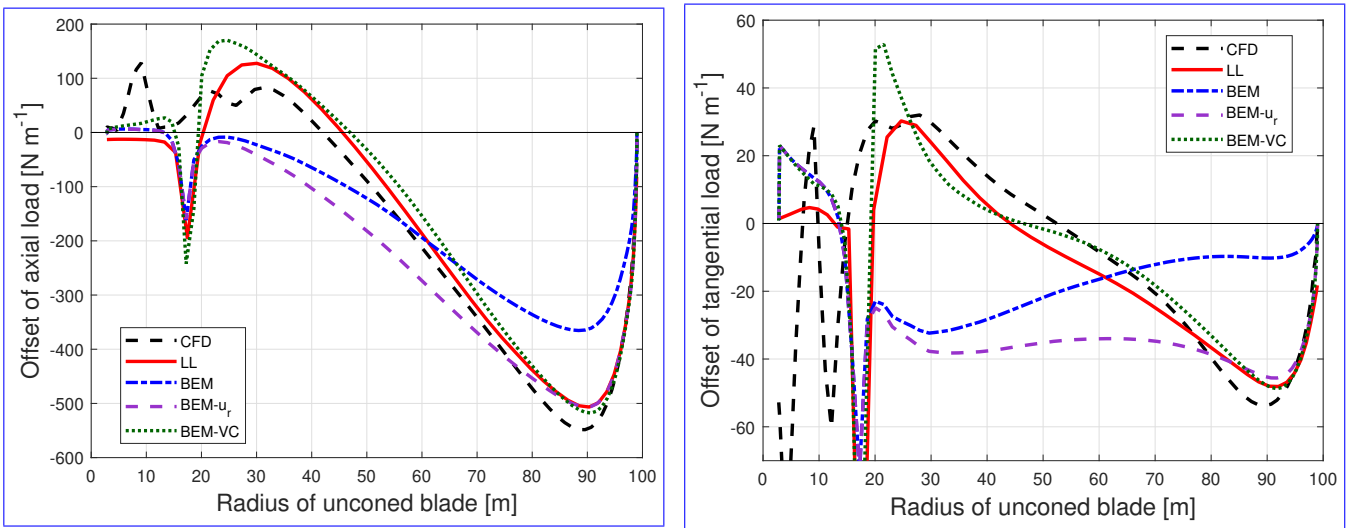

**Figure 15.** Comparison of the difference of the out-of-plane axial load (left) and in-plane tangential load (right) of the baseline blade with  $15^\circ$  of cone downwind compared to the baseline blade without cone calculated from CFD, lifting-line method (LL), BEM method, BEM with radial induction (BEM- $u_r$ ) and the proposed BEM-VC method.

10 For the upwind dihedral blades with  $15^\circ$  of cone downwind on top of it, the difference of the loads compared to the baseline blade with the same cone angle downwind are calculated. The results of the coned dihedral blade W-1 is shown in Fig. 16 in this section. The results of the other upwind dihedral blades with downwind cone are summarized in Appendix B3.

15 It can be seen that for both the straight blade and the upwind dihedral blade with large downwind cone, the results from the proposed method (BEM-VC) are in good agreement with the results from the higher-fidelity models (CFD and LL). On the other hand, the BEM method and the BEM method with radial induction correction (BEM- $u_r$ ) are not able to correctly predict the difference of the loads.

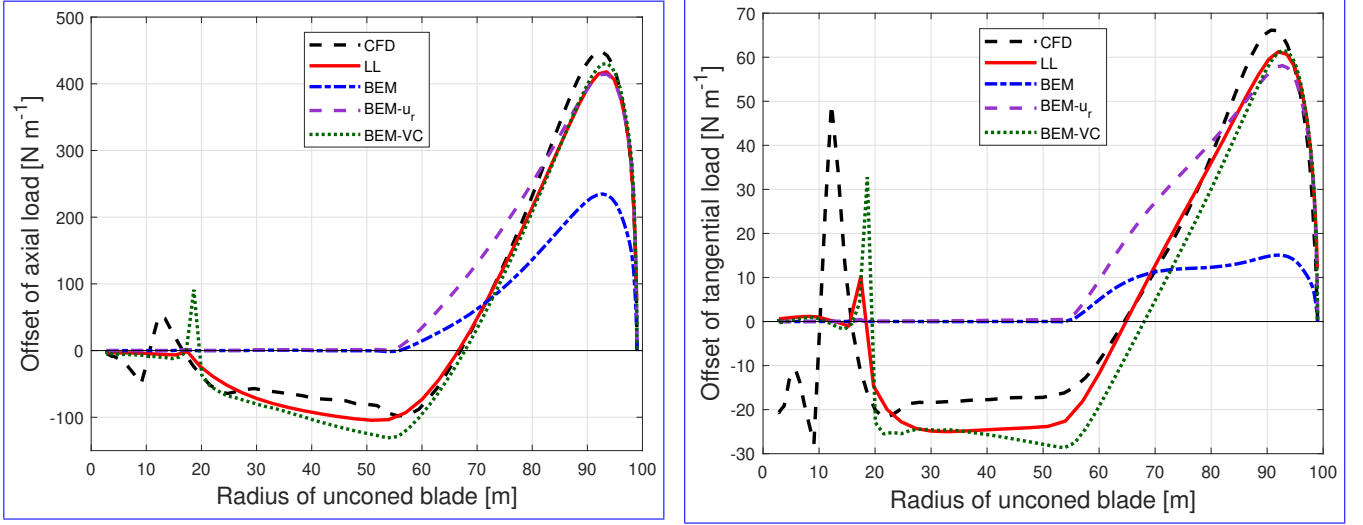

**Figure 16.** Comparison of the difference of the out-of-plane axial load (left) and in-plane tangential load (right) of the upwind dihedral blade W-1 with 15° of cone downwind compared to the baseline blade with the same cone calculated from CFD, lifting-line method (LL), BEM method, BEM with radial induction (BEM- $u_r$ ) and the proposed BEM-VC method.

### 7.3 The integrated aerodynamic loads

The integrated aerodynamic loads, which are the aerodynamic power and thrust from different models are compared in this section. Please note that when comparing the integrated aerodynamic loads, errors in the distributed loads may cancel out. So, it is important to bear in mind that the performance of the different aerodynamic models is not fully represented by their abilities to predict the total aerodynamic power or thrust of the rotor. The aerodynamic force (per unit length of radius)  $\mathbf{F}^*$  on each blade section is consisted of the out-of-plane force  $F_{oop}^*$ , the in-plane force  $F_{ip}^*$ , axial force  $F_a^*$ , the tangential force  $F_t^*$  and the radial force  $F_{rad}^*$ . They are defined to be positive when aligned with  $x$ -,  $z$ - and  $y$ -coordinate respectively as defined in Fig. 1. For the calculation of the aerodynamic load, both lift and drag force are included. The position of applying the force on the blade section is  $\mathbf{p}$ . For simplicity, we use the half-chord point coordinate as  $\mathbf{p}$ . This means we neglect the distance between the half-chord point and the quarter-chord point and also the contribution of the twist to the vector  $\mathbf{p}$ . In addition, the contribution of the sectional airfoil aerodynamic moment (calculated from  $C_m$ ) to the aerodynamic momentum of the rotor is also neglected. Then, the distributed aerodynamic moment from each blade section is:

$$\mathbf{M} = \mathbf{p} \times \mathbf{F}^* = \begin{pmatrix} x \\ y \\ 0 \end{pmatrix} \times \begin{pmatrix} F_a^* \\ F_r^* \\ F_t^* \end{pmatrix} = \begin{pmatrix} yF_t^* \\ -xF_t^* \\ xF_r^* - yF_a^* \end{pmatrix} \quad (42)$$

The  $x$ -component of the aerodynamic moment  $M$  is the contribution to aerodynamic torque. Then, the aerodynamic power of the rotor is the integrated contribution of  $M_x$  of all  $N_B$  blades at rotational speed of  $\Omega$ :

$$P = N_B \Omega \int_0^{R_{tot}} y F_{ip}^* dr \quad (43)$$

The aerodynamic thrust of the rotor is the total contribution of the out-of-plane axial force of all  $N_B$  blades:

$$T = N_B \int_0^{R_{tot}} F_{opa}^* dr \quad (44)$$

The aerodynamic power and thrust of the rotor with baseline straight blades without cone as well as are summarized in Table 2. For the rotors with dihedral blades without cone are calculated. It, it is difficult to directly draw conclusions from the results absolute value of power and thrust. To better illustrate and compare the integral effects of the rotor dihedral represented by the aerodynamic power and thrust predicted using different methods, the relative difference of the aerodynamic power and thrust with respect to the baseline rotor from each method are calculated and are summarized in Table 3 and 4 the bar plots in Fig. 17 and 18.

**Table 2.** The aerodynamic power (in kW) and thrust (in kN) of the rotor with baseline straight blades calculated using different aerodynamic models. The operational condition is with uniform wind speed of  $8 \text{ m s}^{-1}$ , rotational speed  $0.855 \text{ rad s}^{-1}$  and zero cone angle.

| <u>Name</u>   | <u>CFD</u>    | <u>LL</u>     | <u>BEM</u>    | <u>BEM-<math>u_r</math></u> | <u>BEM-VC</u> |
|---------------|---------------|---------------|---------------|-----------------------------|---------------|
| <u>Power</u>  | <u>4358.6</u> | <u>4501.6</u> | <u>4450.8</u> | <u>4450.5</u>               | <u>4451.8</u> |
| <u>Thrust</u> | <u>1070.7</u> | <u>1086.9</u> | <u>1084.0</u> | <u>1084.2</u>               | <u>1083.9</u> |

For the aerodynamic power, the relative change predicted by LL is underestimated compared to the prediction by CFD but the results are showing similar trends. One of the reasons could be the use of the 2-D airfoil data in the lifting-line method. The ordinary BEM method predicts almost no influence of dihedral on power, only except for W-1 that predicts the correct direction that the power increases but underestimates the magnitude. The BEM- $u_r$  method predicts the same direction as CFD and LL that the power of the dihedral rotors are increased compared to the baseline. However, the magnitude of the increment is overestimated by a factor of approximately two. Comparing to the other two BEM methods, the relative increment of power predicted by the proposed BEM-VC method is in better agreement with the predictions by CFD and LL.

For the aerodynamic thrust, the magnitude of the relative decrement is overestimated by approximately 20% by LL comparing to CFD. The BEM method predicts the correct trend that the thrust decreases but the magnitude is underestimated compared to LL and CFD. The BEM- $u_r$  method predicts a small increase of aerodynamic thrust instead of a decrease of thrust as predicted by the higher-fidelity models. The relative change of the thrust predicted by the proposed BEM-VC method is very similar to the results predicted by LL, and the relative difference of the predicted relative change is less than 20%.

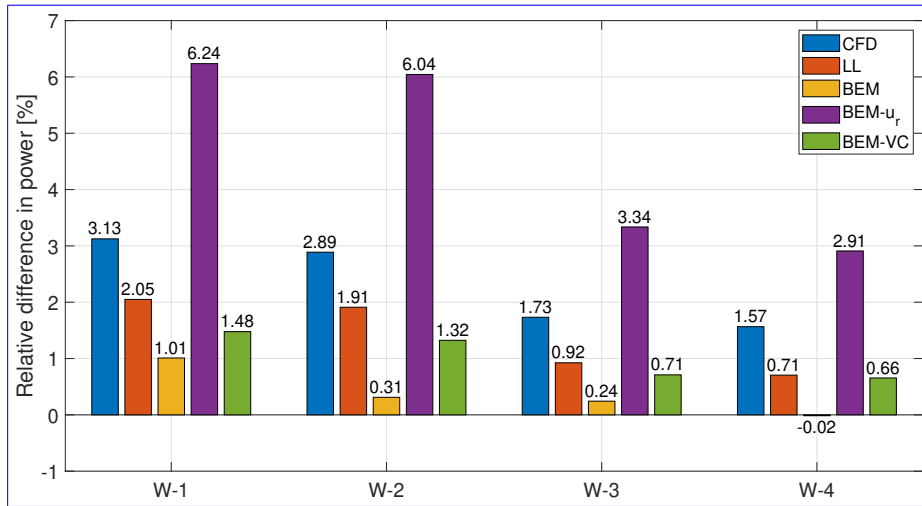

**Figure 17.** The relative difference of power of the dihedral blades without cone compared to the baseline straight blade. The operational condition is with uniform wind speed of  $8 \text{ m s}^{-1}$ , rotational speed  $0.855 \text{ rad s}^{-1}$  and zero cone angle.

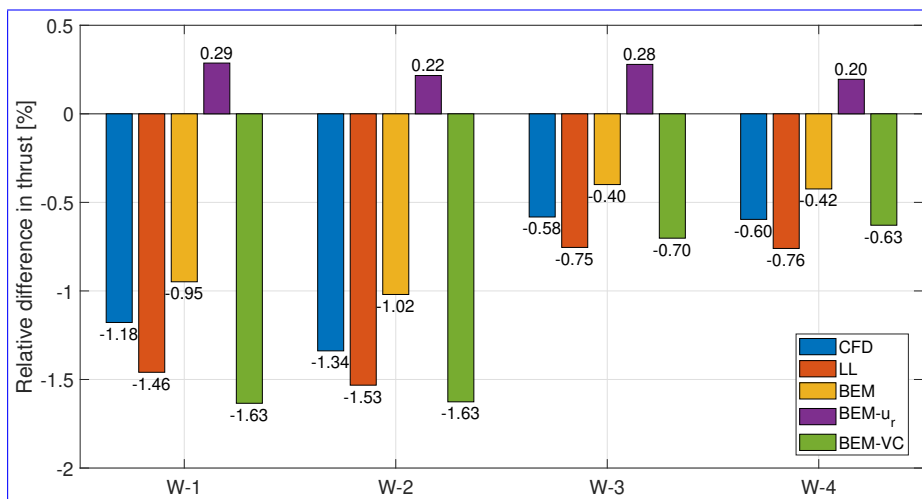

**Figure 18.** The relative difference of thrust the dihedral blades without cone compared to the baseline straight blade. The operational condition is with uniform wind speed of  $8 \text{ m s}^{-1}$ , rotational speed  $0.855 \text{ rad s}^{-1}$  and zero cone angle.

**Table 3.** The aerodynamic power (in kW) of the baseline straight blade and the relative difference in aerodynamic power (in %) of the different dihedral blades with respect to the baseline blades calculated using different aerodynamic models. The operational condition is with uniform wind speed of  $8 \text{ m s}^{-1}$ , rotational speed  $0.855 \text{ rad s}^{-1}$  and zero cone angle.

| Name     | CFD    | LL     | BEM    | BEM- $u_r$ | BEM-VC |
|----------|--------|--------|--------|------------|--------|
| Baseline | 4358.6 | 4501.6 | 4450.8 | 4450.5     | 4451.8 |
| W-1      | 3.13%  | 2.05%  | 1.01%  | 6.24%      | 1.48%  |
| W-2      | 2.89%  | 1.91%  | 0.31%  | 6.04%      | 1.32%  |
| W-3      | 1.73%  | 0.92%  | 0.24%  | 3.34%      | 0.71%  |
| W-4      | 1.57%  | 0.71%  | -0.02% | 2.91%      | 0.66%  |

**Table 4.** The aerodynamic thrust (in kN) of the baseline straight blade and the relative difference in aerodynamic thrust (in %) of the different dihedral blades with respect to the baseline blades calculated using different aerodynamic models. The operational condition is with uniform wind speed of  $8 \text{ m s}^{-1}$ , rotational speed  $0.855 \text{ rad s}^{-1}$  and zero cone angle.

| Name     | CFD    | LL     | BEM    | BEM- $u_r$ | BEM-VC |
|----------|--------|--------|--------|------------|--------|
| Baseline | 1070.7 | 1086.9 | 1084.0 | 1084.2     | 1083.9 |
| W-1      | -1.18% | -1.46% | -0.95% | 0.29%      | -1.63% |
| W-2      | -1.34% | -1.53% | -1.02% | 0.22%      | -1.63% |
| W-3      | -0.58% | -0.75% | -0.40% | 0.28%      | -0.70% |
| W-4      | -0.60% | -0.76% | -0.42% | 0.20%      | -0.63% |

In summary, the proposed BEM-VC model is in better agreement with higher-fidelity models when predicting the integrated aerodynamic power and thrust of the dihedral rotor, compared to the ordinary BEM method. The BEM method with radial induction correction (BEM- $u_r$ ) is predicting worse compared to the BEM method for both aerodynamic power and thrust.

#### 7.4 Low loading cases

The results shown up to this point in this work are all corresponding to fairly high thrust coefficients around approximately 0.9. In this section, the results for operational conditions corresponding to lower thrust coefficients are shown. For simplicity, three of the operational conditions defined in the IEA Wind TCP Task 37 report (Bortolotti et al., 2019) that anticipated lower thrust coefficients are used. The operational conditions of these lower loading cases are summarized in Table 5, by means of wind speed, tip-speed-ratio and pitch angle  $\theta_p$ . For each case, the rotational speed is  $0.909 \text{ rad s}^{-1}$ , and uniform inflow with no yaw error is applied to the rotor. For each operational condition, the baseline straight blade is pitched with  $\theta_p$  and the thrust



coefficient predicted by BEM is also included in Table 5. In order to allow the comparability of the results of this straight blade with the blade accounting for a dihedral angle, the effects of pitching were introduced as an additional twist instead of a rotation around the pitching axis. The motivation for this was related to the introduction of in-plane geometry components by pitching the blade. The twisted blade is named W-1-U\*, where \* is the wind speed. For the results shown in the previous

**Table 5.** The different operational conditions of the lower loading cases used for the comparison.

| wind speed [ $\text{m s}^{-1}$ ] | tip-speed-ratio [-] | additional constant twist $\theta_p$ [ $^\circ$ ] | $C_T$ of straight blade from BEM [-] |
|----------------------------------|---------------------|---------------------------------------------------|--------------------------------------|
| 12.0                             | 7.5                 | 5.98                                              | 0.42                                 |
| 15.0                             | 6.0                 | 11.77                                             | 0.21                                 |
| 20.0                             | 4.5                 | 18.51                                             | 0.09                                 |

5 sections, the lifting-line (LL) results were in good agreement with the CFD results. Therefore, only the LL method is used to generate the higher-fidelity results for the comparison in this section.

First, the differences of the axial load and tangential load of the dihedral blade W-1-U12 and the pitched straight blade are shown in Fig. 19. As for the high loading case in Fig. 12, both the ordinary BEM method and the BEM method with radial

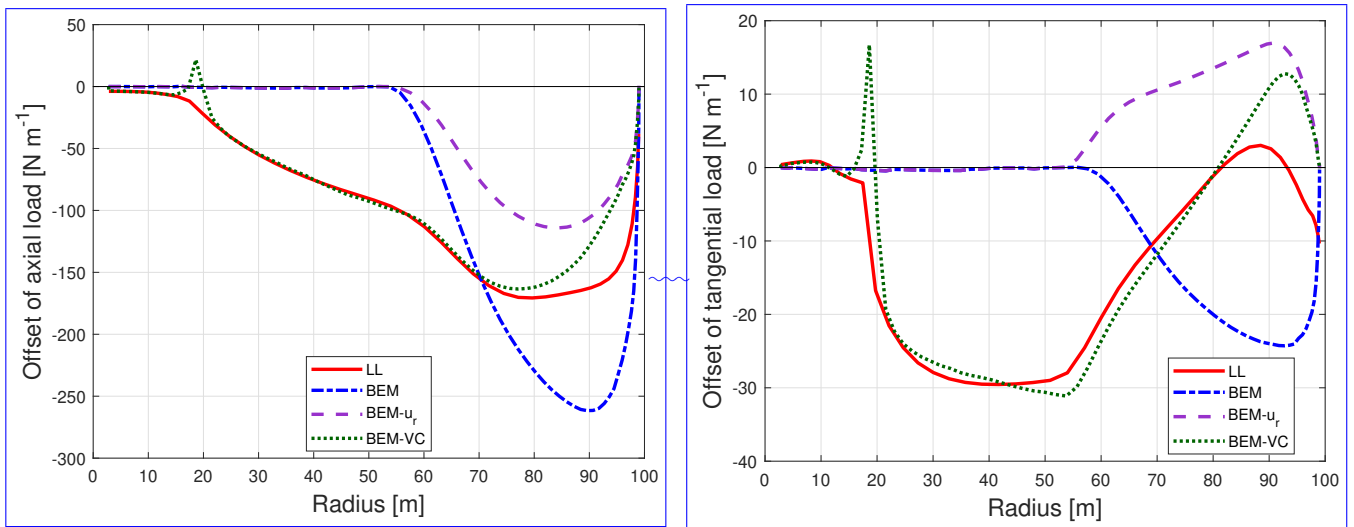

**Figure 19.** Comparison of the difference of the axial load (left) and tangential load (right) of the dihedral blade W-1-U12 compared to the baseline blade calculated from different models. The wind speed is  $12 \text{ m s}^{-1}$ , the tip-speed-ratio is 7.5 and the additional twist angle  $\theta_p$  is  $5.98^\circ$ .

induction correction (BEM- $u_r$ ) are not able to correctly predict the influence of blade dihedral. In comparison, the proposed BEM-VC method correctly predicts the shape and magnitude of the load redistribution for both axial and tangential loads. The decrease of the load further inboard compared to where the blade starts to dihedral is also well predicted. As for the high

10

loading case, the largest difference between the LL and the BEM-VC results are mainly for the tip-most part. As previously mentioned, this could be due to the use of Prandtl's tip-loss correction in the model.

The results for the dihedral blades W-1-U15 and W-1-U20, at wind speeds of  $15 \text{ m s}^{-1}$  and  $20 \text{ m s}^{-1}$  respectively, are shown in Fig. 20 and 21. The same conclusion can be made from these lower loading results. However, with the decrease of the thrust coefficient, the difference between the prediction by the BEM method and the LL method decreases. This is because the relative importance of the induced velocities decrease in these cases, making the performance more directly dictated by the velocity components from the inflow and the rotor rotation, and less from the induced velocities.

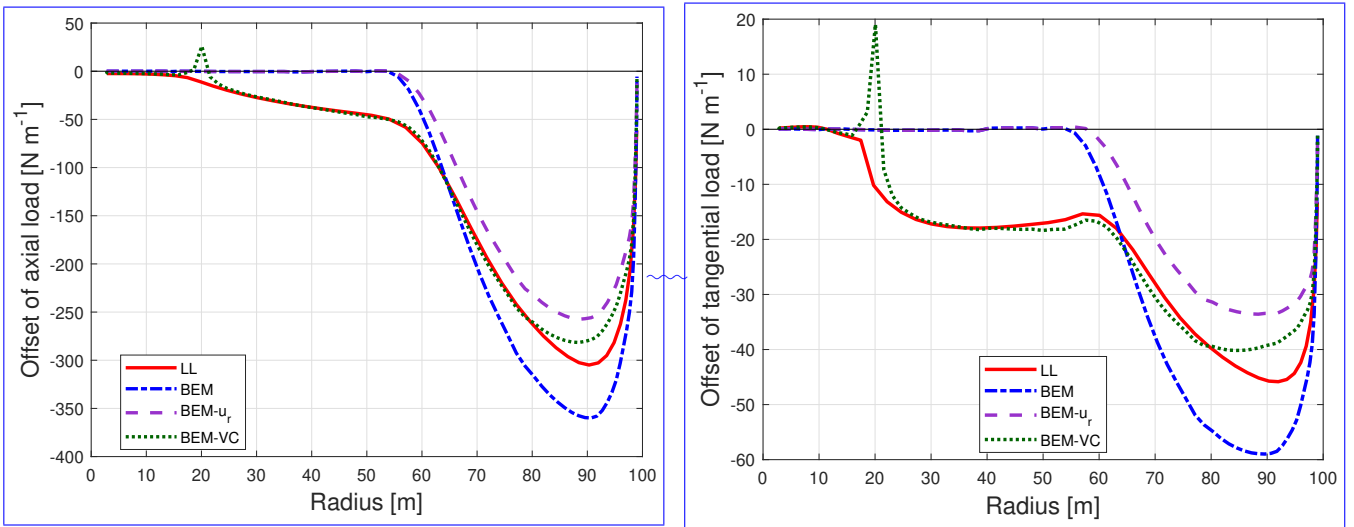

**Figure 20.** Comparison of the difference of the axial load (left) and tangential load (right) of the dihedral blade W-1-U15 compared to the baseline blade calculated from different models. The wind speed is  $15 \text{ m s}^{-1}$ , the tip-speed-ratio is 6.0 and the additional twist angle  $\theta_p$  is  $11.77^\circ$ .

## 7.5 Computational effort

The computational effort to obtain the steady-state results used in the present work, measured in CPU time, are summarized in this section. The CFD computations using EllipSys3D were performed on DTU's high-performance computing (HPC) cluster Jess, in which each node has 20 cores running at 2.8 GHz. All the CFD simulations of the present work required a wall clock time of approximately 3.5 h when using 216 cores. The lifting-line (LL) computations using the MIRAS code were performed on the Sophia HPC cluster, in which each node has 32 cores running at 2.9 GHz. Each of the LL simulations in the present work required a wall clock time of approximately 100 h when using 32 cores. Note that the computational time for the LL method in the MIRAS code in this study is relatively high, because the settings were chosen to achieve the highest possible fidelity irrespective of the computational cost. Therefore the computational effort for the MIRAS calculations in this work is not indicative of the performance for normal use of the tool. Settings that increased the computational effort in this work

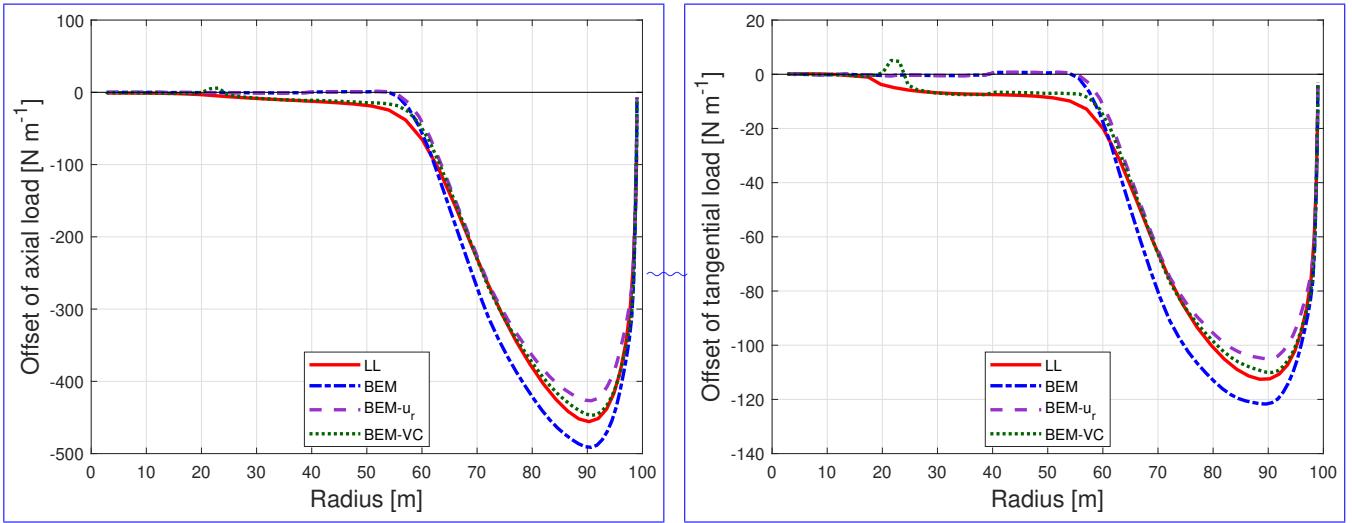

**Figure 21.** Comparison of the difference of the axial load (left) and tangential load (right) of the dihedral blade W-1-U15 compared to the baseline blade calculated from different models. The wind speed is  $20 \text{ m s}^{-1}$ , the tip-speed-ratio is 4.5 and the additional twist angle  $\theta_p$  is  $18.51^\circ$ .

are: small time steps, not using far-wake cut-off, etc. The computational time is expected to be largely decreased if efforts are dedicated to improving the simulation setup. However, this is beyond the scope of the present work.

The computations using the HAWC2 code were performed on a single core of a 2018 workstation at 4.8 GHz. The simulations were performed with structural properties included and with large stiffness to approximate stiff structures. The simulations were run for 600 s in the simulation-time to reach steady-state. The simulations required a wall clock time of approximately 600 s and 650 s for the BEM method and the BEM-VC method, respectively. For a stand-alone version of the BEM method or the BEM-VC/BEVC method, one steady-state computation can be done in much less than one second using a single CPU core.

## 8 Conclusions and future work

A new computationally efficient method for the aerodynamic load calculation of non-planar rotors is described. The method is based on the vortex cylinder model, and can be used in two ways: either as a correction to the currently widely used blade element momentum (BEM) method, or used as the main model, replacing the BEM method in the engineering modelling complex. For the uniform inflow that is perpendicular to the rotor plane, the influence of the blade out-of-plane shapes on the distributed aerodynamic loads, measured by the difference of the loads between the non-planar rotor and the planar rotor, is shown to be in good agreement with higher-fidelity models. The predicted distributed and integrated aerodynamic loads are also in better agreement with higher-fidelity models, comparing to the than the baseline BEM method and also the a BEM method with a radial induction correction. While the present work focused on stiff geometries, the developed framework would be able to handle out-of-plane deflections during aeroelastic simulations accounting for blade elasticity, without any

loss of generality. The new model is approximately as numerically efficient as ordinary BEM-based models, which makes it favourable for aero-servo-elastic simulation as well as design optimization of horizontal-axis wind turbines whose blades have out-of-plane shapes. Therefore, the authors recommend the use of the proposed model as a correction to the existing BEM codes.

5 For the future work on the model applications, it would be interesting to use both the standard BEM method and the proposed method for the aerodynamic or aeroelastic design of a non-planar rotor under the same constraints. Higher-fidelity models, such as CFD or lifting-line method could be used for the benchmark of the different designs, as done in the present work. The method is also favourable for integration in a multi-fidelity aerodynamic design framework. There are ~~several future works needed to further~~ also several ways in which future work could improve the model. Firstly, it ~~is~~ would be favourable to have modifications to the existing Prandtl's tip-loss correction. For example, it is possible to use the distance between the tip vortex and the calculation point when calculating the correction for a non-planar rotor, instead of using the radial distance as currently implemented in the model. Secondly, it ~~is~~ would be beneficial to further develop the model for the application of blades with both in-plane and out-of-plane shapes. One possible track of the development is to couple the vortex cylinder model and the near-wake model, which approximately models the near-wake as helical trailed vorticities and is currently coupled with  
15 a far-wake BEM method. Thirdly, it ~~is interesting to use both the BEM method and the proposed method for the aerodynamic or aeroelastic design of a~~ would be interesting to investigate the unsteady effects of the non-planar rotor ~~under some constraints. Higher-fidelity models, such as CFD or lifting-line method can be used for the benchmark of different designs, as done for the present work~~ aerodynamic damping and dynamic inflow effect. Fourthly, it would be beneficial to further develop the vortex cylinder model for the application of non-planar rotors in yawed flow. Finally, further development of the model focusing  
20 on analytical gradients ~~is favourable for the~~ would be favourable for application in a gradient-based wind turbine design optimization framework.

*Code and data availability.* TEXT

*Author contributions.* AL conducted the study as part of his PhD research. The idea of the proposed model originates from MG. The proposed model is jointly developed by MG, AL and GRP. The similarities of the superposition of the vortex cylinder model of non-planar rotor and  
25 planar rotor are described by AL and MG. The application of the tip-loss correction as well as high-thrust correction for the non-planar rotor is described by AL and MG. The implementation of the proposed model in HAWC2 code and the computations using the HAWC2 code are performed by AL with contribution from GRP. The CFD method is introduced by SGH and the CFD results are computed by SGH. The post-processing of the CFD results is performed by SGH with contribution from AL. The lifting-line results are computed by AL and the post-processing is performed by AL. All authors jointly draw the conclusions of the work and contribute to writing this work.

30 *Competing interests.* DTU Wind Energy develops and distributes HAWC2 on commercial and academic terms.

*Disclaimer.* TEXT

*Acknowledgements.* The authors would like to thank our colleague Néstor Ramos García in DTU Wind Energy for the suggestions in the lifting-line simulation using MIRAS, a vortex code mainly developed by him. This work has been supported by the Smart Tip project, funded by Innovation Fund Denmark (J.nr. 7046-00023B).

## Appendix A: Nomenclature

- $a$  axial induction
- $a'$  tangential induction
- $C_L$  lift coefficient
- 5  $C_D$  drag coefficient
- $C_m$  moment coefficient
- $C_Q$  torque coefficient
- $C_T$  thrust coefficient
- $C_{T,\text{eff}}$  effective thrust coefficient
- 10  $C_{T,\text{KJ}}$  Kutta-Joukowski thrust coefficient
- $C_{T,\text{rot}}$  thrust coefficient due to wake rotation
- $C_{T,\text{av}}$  averaged coefficient for the radial induction function
- $\Delta d$  dihedral magnitude
- $\mathbf{f}$  lift force vector on the blade with the definition of force per unit length of curved blade length
- 15  $\mathbf{f}^*$  lift force vector on the blade with the definition of force per unit radius
- $\mathbf{F}^*$  aerodynamic force vector on the blade with the definition of force per unit radius
- $F$  tip-loss factor
- $h$  helical pitch
- $k$  factor for the calculation of the elliptic integral
- 20  $k_1, k_2, k_3$  factors for the relationship between axial induction and thrust coefficient
- $k_s$  normalized sectional circulation of the vortex cylinder
- $\mathbf{M}$  the aerodynamic moment vector
- $N_B$  number of blades
- $P$  aerodynamic power of the rotor
- 25  $r$  radius of the calculation point
- $R$  radius of the vortex cylinder
- $R_{\text{tot}}$  radius of the rotor
- $T$  aerodynamic thrust of the rotor
- $u_a$  axial induced velocity
- 30  $u_t$  tangential induced velocity
- $u_r$  radial induced velocity
- $\Delta u_a$  the correction to the axial induced velocity
- $\Delta u_r$  the correction to the radial induced velocity
- $U_0$  wind speed

$V_{rel}$  relative velocity

$x$  axial position of the calculation point with respect to the vortex cylinder

### Greek letters

5  $\Gamma$  bound vorticity strength of the vortex cylinder, equal to the bound vorticity strength of all blades

$\Gamma^B$  blade bound vorticity strength

$\Gamma_{root}$  [root vortex](#)

$\Delta\Gamma$  trailed vorticity strength of the vortex cylinder

$\gamma_b$  [radial bound vorticity strength](#)

10  $\gamma_l$  [longitudinal vorticity strength of the vortex cylinder](#)

$\gamma_t$  tangential vorticity strength of the vortex cylinder

$\Lambda_{tip}$  tip dihedral angle

$\varphi$  inflow angle

$\rho$  density of air

15  $\theta_c$  cone angle

$\kappa$  dihedral angle

$\Omega$  rotor speed

$\lambda_r$  speed ratio at radius  $r$

### 20 Subscripts

$a$  in the axial direction

$t$  in the tangential direction

$r$  in the radial direction

$i$  at blade section  $i$

25  $B$  the value at the blade

$\infty$  the annulus averaged value

eff effective value

tot the total value

MT from the momentum theory

30 BEM from the BEM method

VC from the vortex cylinder model

### Superscripts

$B$  the value at the blade

np the non-planar rotor

35 pl the planar rotor

$QS$  quasi-steady  
 $C$  circulatory part

## Appendix B: Results of the distributed load

### 5 B1 Zero cone angle

The difference of the loads of the dihedral blades (W-2 to W-4) with zero cone compared to the baseline straight blade without cone.

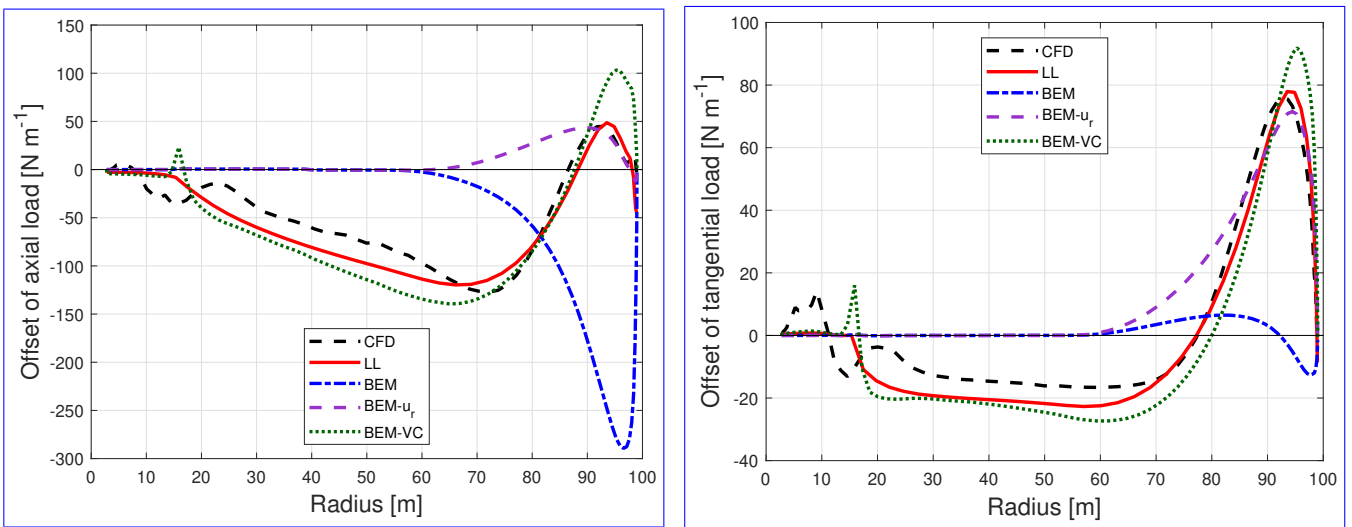

**Figure B1.** Comparison of the difference of the out-of-plane axial load (left) and in-plane tangential load (right) of the dihedral blade W-2 compared to the baseline blade calculated from CFD, lifting-line method (LL), BEM method, BEM with radial induction (BEM- $u_r$ ) and the proposed BEM-VC method.

### B2 Upwind cone

The difference of the loads of the dihedral blades (W-2 to W-4) with 15° cone upwind compared to the baseline straight blade with the same upwind cone.

### B3 Downwind cone

The difference of the loads of the dihedral blades (W-2 to W-4) with 15° cone downwind compared to the baseline straight blade with the same downwind cone.



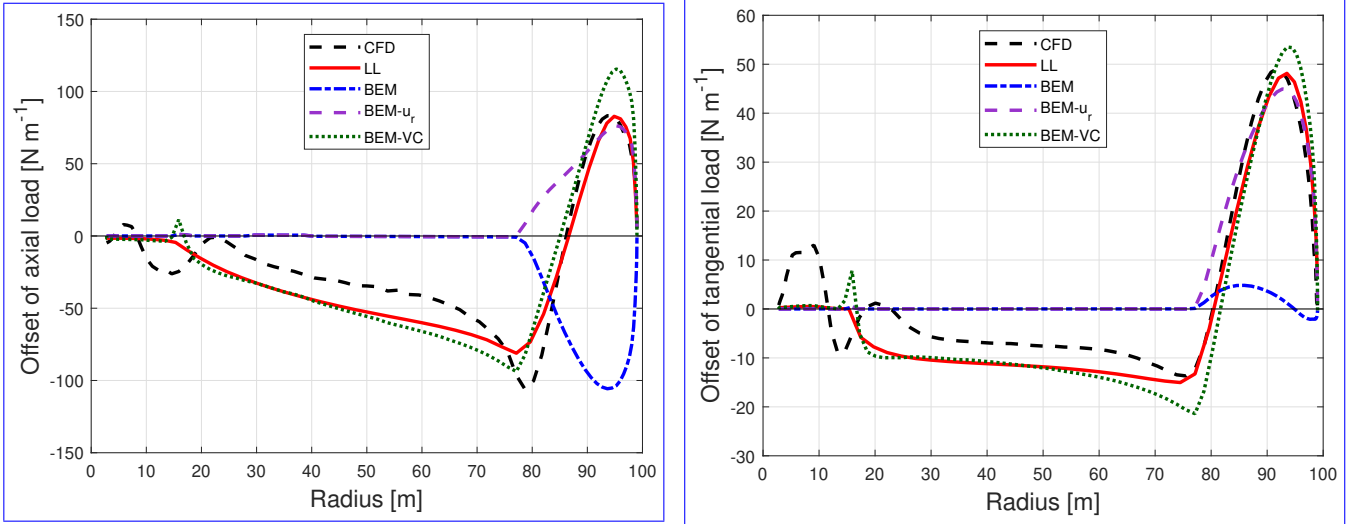

**Figure B2.** Comparison of the difference of the out-of-plane axial load (left) and in-plane tangential load (right) of the dihedral blade W-3 compared to the baseline blade calculated from different aerodynamic models.

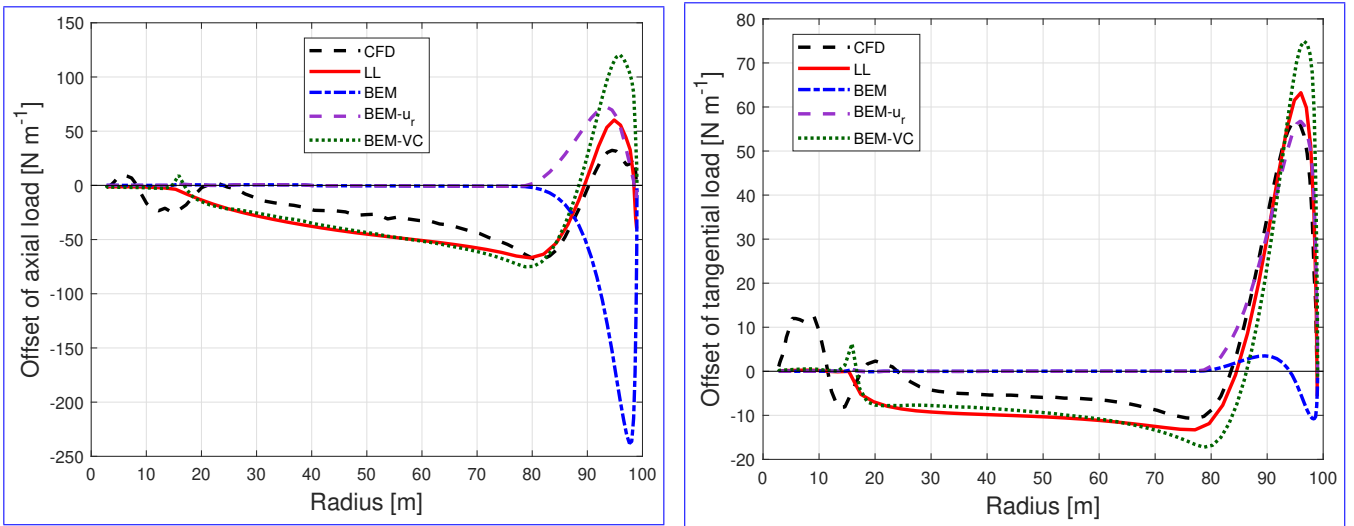

**Figure B3.** Comparison of the difference of the out-of-plane axial load (left) and in-plane tangential load (right) of the dihedral blade W-4 compared to the baseline blade calculated from different aerodynamic models.

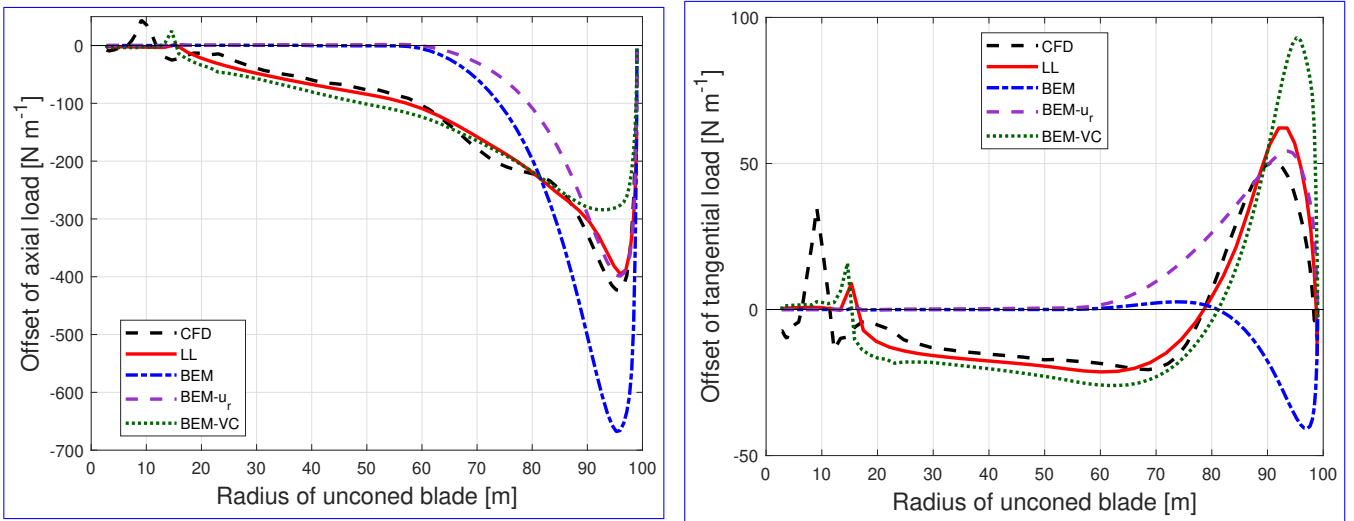

**Figure B4.** Comparison of the difference of the out-of-plane axial load (left) and in-plane tangential load (right) of the dihedral blade W-2 with 15° of cone upwind compared to the baseline blade with the same cone calculated from CFD, lifting-line method (LL), BEM method, BEM with radial induction (BEM- $u_r$ ) and the proposed BEM-VC method.

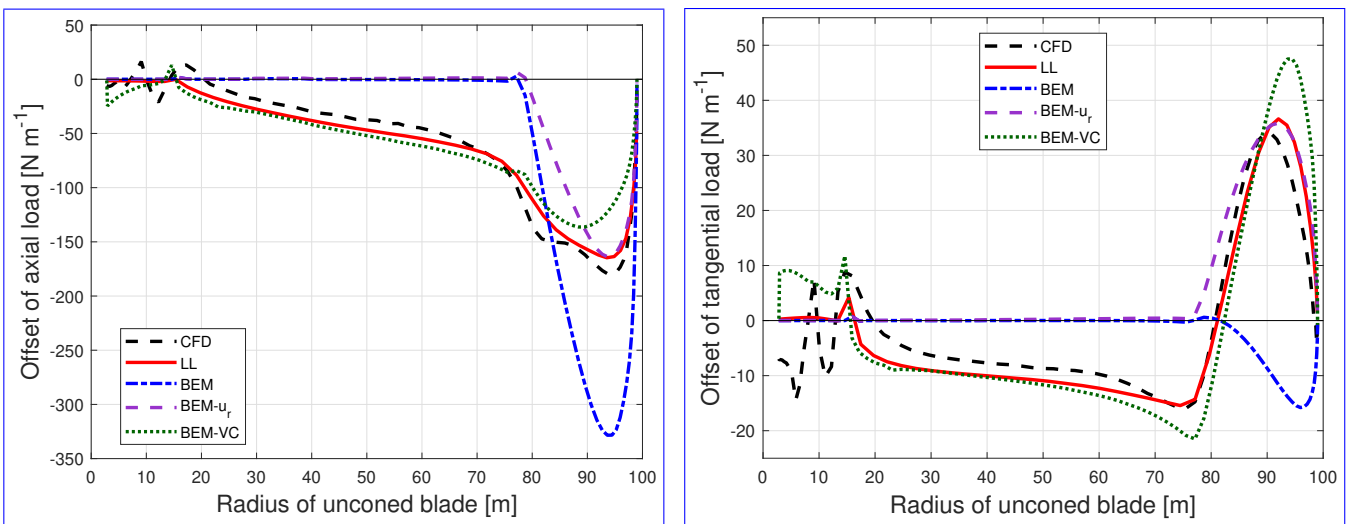

**Figure B5.** Comparison of the difference of the out-of-plane axial load (left) and in-plane tangential load (right) of the dihedral blade W-3 with 15° of cone upwind compared to the baseline blade with the same cone calculated from different aerodynamic models.

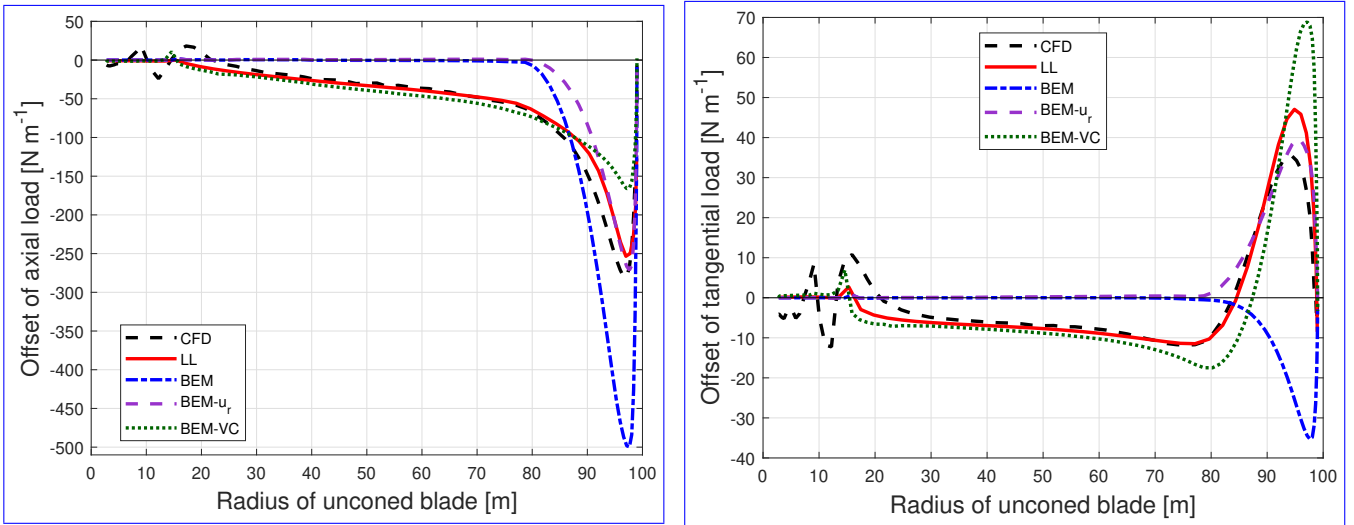

**Figure B6.** Comparison of the difference of the out-of-plane axial load (left) and in-plane tangential load (right) of the dihedral blade W-4 with 15° of cone upwind compared to the baseline blade with the same cone calculated from different aerodynamic models.

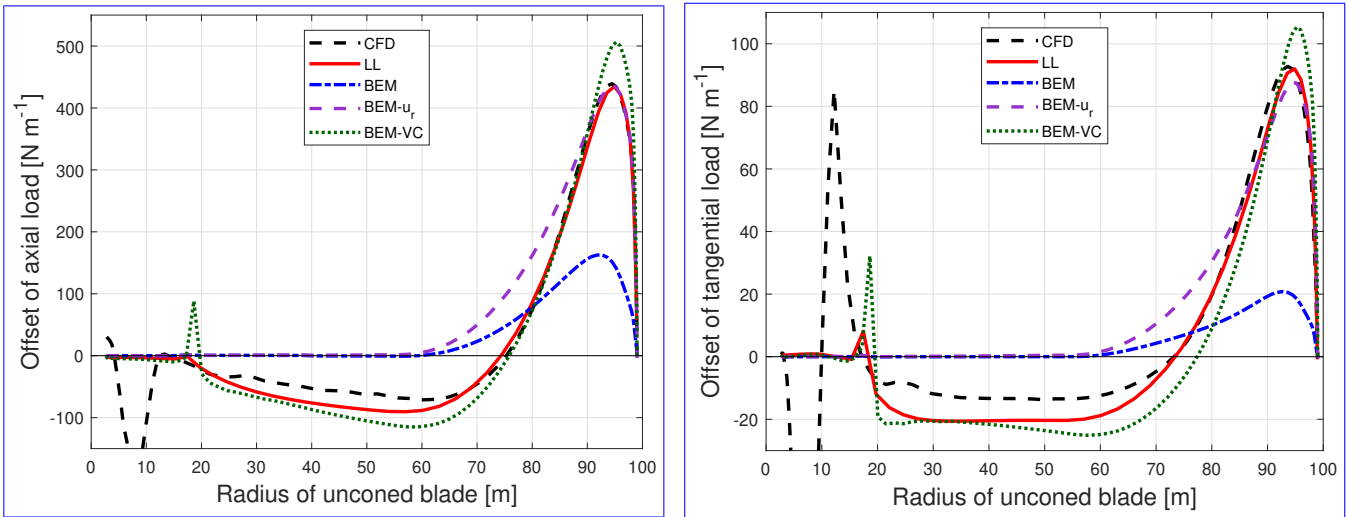

**Figure B7.** Comparison of the difference of the out-of-plane axial load (left) and in-plane tangential load (right) of the dihedral blade W-2 with 15° of cone downwind compared to the baseline blade with the same cone calculated from CFD, lifting-line method (LL), BEM method, BEM with radial induction (BEM- $u_r$ ) and the proposed BEM-VC method.

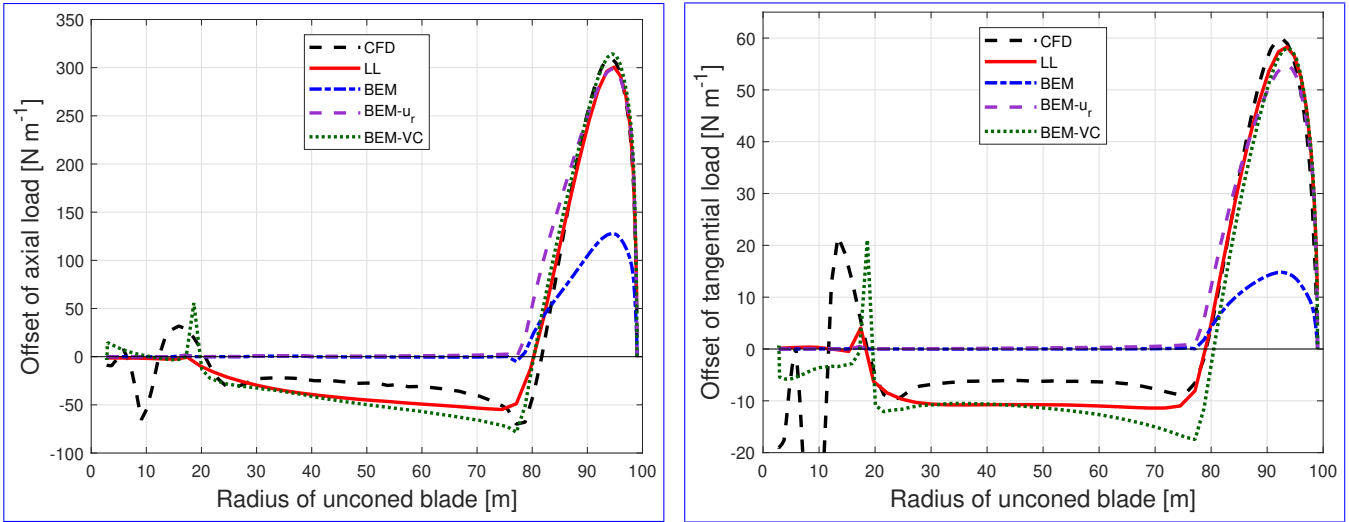

**Figure B8.** Comparison of the difference of the out-of-plane axial load (left) and in-plane tangential load (right) of the dihedral blade W-3 with 15° of cone downwind compared to the baseline blade with the same cone calculated from different aerodynamic models.

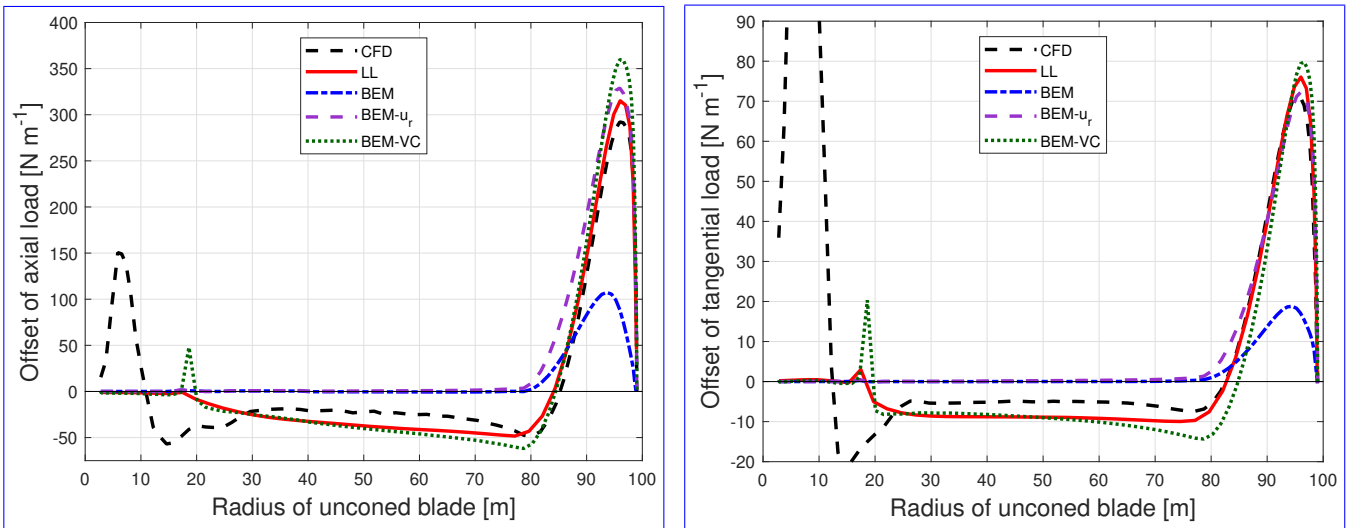

**Figure B9.** Comparison of the difference of the out-of-plane axial load (left) and in-plane tangential load (right) of the dihedral blade W-4 with 15° of cone downwind compared to the baseline blade with the same cone calculated from different aerodynamic models.

## References

- Bergami, L. and Gaunaa, M.: ATEFlap Aerodynamic Model, a dynamic stall model including the effects of trailing edge flap deflection, Danmarks Tekniske Universitet, Risø Nationallaboratoriet for Bæredygtig Energi, 2012.
- Bortolotti, P., Tarrés, H. C., Dykes, K., Merz, K., Sethuraman, L., Verelst, D., and Zahle, F.: Systems Engineering in Wind Energy - WP2.1 Reference Wind Turbines, Tech. rep., National Renewable Energy Laboratory (NREL), <https://www.osti.gov/biblio/1529216-iea-wind-tcp-task-systems-engineering-wind-energy-wp2-reference-wind-turbines>, 2019.
- 5 Branlard, E.: Wind Turbine Aerodynamics and Vorticity-Based Methods, Springer, <https://doi.org/10.1007/978-3-319-55164-7>, 2017.
- Branlard, E. and Gaunaa, M.: Development of new tip-loss corrections based on vortex theory and vortex methods, Journal of Physics: Conference Series, 555, 012 012, <https://doi.org/10.1088/1742-6596/555/1/012012>, 2014.
- 10 Branlard, E. and Gaunaa, M.: Superposition of vortex cylinders for steady and unsteady simulation of rotors of finite tip-speed ratio, Wind Energy, 19, 1307–1323, <https://doi.org/10.1002/we.1899>, 2015a.
- Branlard, E. and Gaunaa, M.: Cylindrical vortex wake model: right cylinder, Wind Energy, 18, 1973–1987, <https://doi.org/10.1002/we.1800>, 2015b.
- Branlard, E. and Gaunaa, M.: Cylindrical vortex wake model: skewed cylinder, application to yawed or tilted rotors, Wind Energy, 19, 345–358, <https://doi.org/doi.org/10.1002/we.1838>, 2016.
- 15 Branlard, E. and Meyer Forsting, A.: Using a cylindrical vortex model to assess the induction zone in front of aligned and yawed rotors, in: Proceedings of EWEA Offshore 2015 Conference, European Wind Energy Association (EWEA), EWEA Offshore 2015 Conference ; Conference date: 10-03-2015 Through 12-03-2015, 2015.
- Branlard, E. and Meyer Forsting, A.: Assessing the blockage effect of wind turbines and wind farms using an analytical vortex model, Wind Energy, 23, 2068–2086, <https://doi.org/10.1002/we.2546>, 2020.
- 20 Burton, T., Jenkins, N., Sharpe, D., Bossanyi, E., and Graham, M.: Wind energy handbook, Wiley, 2021.
- Crawford, C.: Re-examining the precepts of the blade element momentum theory for coning rotors, Wind Energy, 9, 457–478, <https://doi.org/10.1002/we.197>, 2006.
- Gaunaa, M.: Unsteady Aerodynamic Forces on NACA 0015 Airfoil in Harmonic Translatory Motion, Ph.D. thesis, 2002.
- 25 Glauert, H.: Airplane Propellers, in: Division L in Aerodynamic Theory, vol. IV, Durand WF (ed.), pp. 169–360, Springer, 1935.
- Hansen, M. H., Gaunaa, M., and Madsen, H. A.: A Beddoes-Leishman type dynamic stall model in state-space and indicial formulations, Risø-R-1354, Roskilde, Denmark, 2004.
- Larsen, J., Nielsen, S., and Krenk, S.: Dynamic stall model for wind turbine airfoils, Journal of Fluids and Structures, 23, 959–982, <https://doi.org/10.1016/j.jfluidstructs.2007.02.005>, 2007.
- 30 Larsen, T. and Hansen, A.: How 2 HAWC2, the user's manual, no. 1597(ver. 3-1)(EN) in Denmark. Forskningscenter Risø. Risø-R, Risø National Laboratory, 2007.
- Leishman, J. G.: Principles of helicopter aerodynamics, Cambridge University Press, 2005.
- Leishman, J. G. and Nguyen, K. Q.: State-space representation of unsteady airfoil behavior, AIAA Journal, 28, 836–844, <https://doi.org/10.2514/3.25127>, 1990.
- 35 Li, A., Pirrung, G., Madsen, H. A., Gaunaa, M., and Zahle, F.: Fast trailed and bound vorticity modeling of swept wind turbine blades, Journal of Physics: Conference Series, 1037, 2018.

- Li, A., Gaunaa, M., Pirrung, G. R., Ramos-García, N., and Horcas, S. G.: The influence of the bound vortex on the aerodynamics of curved wind turbine blades, *Journal of Physics: Conference Series*, 1618, 052 038, <https://doi.org/10.1088/1742-6596/1618/5/052038>, 2020.
- Li, A., Pirrung, G. R., Gaunaa, M., Madsen, H. A., and Horcas, S. G.: A computationally efficient engineering aerodynamic model for swept wind turbine blades, *Wind Energy Science Discussions*, 2021, 1–49, <https://doi.org/10.5194/wes-2021-96>, 2021.
- 5 Madsen, H. and Rasmussen, F.: The influence on energy conversion and induction from large blade deflections, *Wind Energy for the Next Millennium. Proceedings*, pp. 138–141, 1999.
- Madsen, H. A.: A CFD analysis of the actuator disc flow compared with momentum theory results, in: IEA Joint action. Aerodynamics of wind turbines, edited by Maribo Pedersen, B., pp. 109–124, Technical University of Denmark. Department of Fluid Mechanics, 10th IEA Meeting on Aerodynamics, IEA ; Conference date: 16-12-1996 Through 17-12-1996, 1997.
- 10 Madsen, H. A. and Rasmussen, F.: A near wake model for trailing vorticity compared with the blade element momentum theory, *Wind Energy*, 7, 325–341, <https://doi.org/10.1002/we.131>, 2004.
- Madsen, H. A., Mikkelsen, R., Øye, S., Bak, C., and Johansen, J.: A Detailed investigation of the Blade Element Momentum (BEM) model based on analytical and numerical results and proposal for modifications of the BEM model, *Journal of Physics: Conference Series*, 75, 012 016, <https://doi.org/10.1088/1742-6596/75/1/012016>, 2007.
- 15 Madsen, H. A., Bak, C., Døssing, M., Mikkelsen, R. F., and Øye, S.: Validation and modification of the Blade Element Momentum theory based on comparisons with actuator disc simulations, *Wind Energy*, 13, 373–389, <https://doi.org/10.1002/we.359>, 2010.
- Madsen, H. A., Larsen, T. J., Pirrung, G. R., Li, A., and Zahle, F.: Implementation of the blade element momentum model on a polar grid and its aeroelastic load impact, *Wind Energy Science*, 5, 1–27, <https://doi.org/10.5194/wes-5-1-2020>, 2020a.
- Madsen, H. A., Zahle, F., Meng, F., Barlas, T., Rasmussen, F., and Rudolf, R. T.: Initial performance and load analysis of the LowWind turbine in comparison with a conventional turbine, *Journal of Physics: Conference Series*, 1618, 032 011, <https://doi.org/10.1088/1742-6596/1618/3/032011>, 2020b.
- 20 Mann, J.: The spatial structure of neutral atmospheric surface-layer turbulence, *J. Fluid Mech.*, 273, 141–168, 1994.
- Menter, F. R.: Two-equation eddy-viscosity turbulence models for engineering applications, *AIAA Journal*, 32, 1598–1605, 1994.
- Michelsen, J. A.: Basis3D - a Platform for Development of Multiblock PDE Solvers, Tech. Rep. AFM 92-05, Technical University of Denmark, 1992.
- 25 Michelsen, J. A.: Block structured Multigrid solution of 2D and 3D elliptic PDE's, Tech. Rep. AFM 94-06, Technical University of Denmark, 1994.
- Mikkelsen, R.: Actuator Disc Methods Applied to Wind Turbines, Ph.D. thesis, Technical University of Denmark, 2004.
- Okulov, V., Sørensen, J., and Wood, D.: The rotor theories by Professor Joukowsky: Vortex theories, *Progress in Aerospace Sciences*, 73, 19–46, <https://doi.org/10.1016/j.paerosci.2014.10.002>, 2015.
- 30 Øye, S.: A Simple Vortex Model, in: *Proceedings of the third IEA Symposium on the Aerodynamics of Wind Turbines*, pp. 4.1–4.15, ETSU, Harwell (UK), 1990.
- Pirrung, G., Riziotis, V., Madsen, H. A., Hansen, M., and Kim, T.: Comparison of a Coupled Near and Far Wake Model With a Free Wake Vortex Code, *Wind Energy Science*, 2, 15–33, 2017.
- 35 Pirrung, G. R. and Gaunaa, M.: Dynamic stall model modifications to improve the modeling of vertical axis wind turbines, DTU Wind Energy E-0171, Roskilde, Denmark, 2018.
- Ramos-García, N., Sørensen, J., and Shen, W.: Three-dimensional viscous-inviscid coupling method for wind turbine computations, *Wind Energy*, 19, 67–93, 2016.

- Schepers, J. G. and Snel, H.: Joint investigation of dynamic inflow effects and implementation of an engineering method., Tech. rep., ECN, ECN-C-94-107, 1995.
- Sørensen, J. N.: General Momentum Theory for Horizontal Axis Wind Turbines, vol. 4, Springer, 2015.
- Sørensen, N. N.: General Purpose Flow Solver Applied to Flow over Hills, Risø-R- 827-(EN), Risø National Laboratory, Roskilde, Denmark, 5 1995.
- Sørensen, N. N.: HypGrid2D a 2-D Mesh Generator, Risø-R- 1035-(EN), Risø National Laboratory, Roskilde, Denmark, 1998.
- Spera, D. A.: Wind turbine technology: fundamental concepts of wind turbine engineering, ASME Press, 1994.
- Yu, W., Tavernier, D., Ferreira, C., van Kuik, G. A. M., and Schepers, G.: New dynamic-inflow engineering models based on linear and nonlinear actuator disc vortex models, *Wind Energy*, 22, 1433–1450, <https://doi.org/10.1002/we.2380>, 2019.
- 10 Zahle, F.: Parametric Geometry Library (PGL), Tech. rep., DTU Wind Energy, <https://gitlab.windenergy.dtu.dk/frza/PGL>, 2019.
